# Supplementary material
Source: PubMed Central journal article supplement (PMC4406804)

# The Cardiac Transcriptome and Dilated Cardiomyopathy Genes in Zebrafish

**Running title:** *Shih et al.; Zebrafish Cardiac Transcriptome and DCM Genes*

Yu-Huan Shih, PhD<sup>1</sup>; Yuji Zhang, PhD<sup>6,7</sup>; Yonghe Ding, PhD<sup>1</sup>; Christian A. Ross, PhD<sup>2</sup>;  
Hu Li, PhD<sup>3</sup>; Timothy M. Olson, MD<sup>4,5</sup>; Xiaolei Xu, PhD<sup>1,5</sup>

<sup>1</sup>Department of Biochemistry and Molecular Biology, <sup>2</sup>Information Technology, <sup>3</sup>Department of Molecular Pharmacology and Experimental Therapeutics, <sup>4</sup>Department of Pediatric and Adolescent Medicine, <sup>5</sup>Division of Cardiovascular Diseases, Mayo Clinic, Rochester, MN, <sup>6</sup>Division of Biostatistics and Bioinformatics, University of Maryland Greenebaum Cancer Center, and <sup>7</sup>Department of Epidemiology and Public Health, University of Maryland School of Medicine, Baltimore, MD

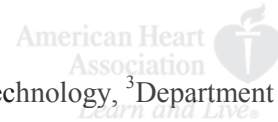

Circulation  
Cardiovascular Genetics

JOURNAL OF THE AMERICAN HEART ASSOCIATION

## Correspondence:

Xiaolei Xu, PhD

Department of Biochemistry and Molecular Biology

Mayo Clinic

200 First St SW

Rochester, MN 55905

Tel: 507-284-0685

Fax: 507-538-6418).

E-mail: [xu.xiaolei@mayo.edu](mailto:xu.xiaolei@mayo.edu)

**Journal Subject Codes:** [130] Animal models of human disease, [148] Heart failure - basic studies, [146] Genomics, [89] Genetics of cardiovascular disease

**Abstract:**

**Background** - Genetic studies of cardiomyopathy and heart failure have limited throughput in mammalian models. Adult zebrafish have been recently pursued as a vertebrate model with higher throughput, but genetic conservation must be tested.

**Methods and Results** - We conducted transcriptome analysis of zebrafish heart and searched for fish homologues of 51 known human dilated cardiomyopathy (DCM)-associated genes. We also identified genes with high cardiac expression and genes with differential expression between embryonic and adult stages. Among tested genes, 30 had a single zebrafish orthologue, 14 had 2 homologues, and 5 had 3 or more homologues. By analyzing the expression data on the basis of cardiac abundance and enrichment hypotheses, we identified a single zebrafish gene for 14 of 19 multiple-homologue genes and 2 zebrafish homologues of high priority for *ACTC1*. Of note, our data suggested *vmhc* and *vmhcl* as functional zebrafish orthologues for human *MYH6* and *MYH7*, respectively, which are established molecular markers for cardiac remodeling.

**Conclusions** - Most known genes for human DCM have a corresponding zebrafish orthologue, which supports the use of zebrafish as a conserved vertebrate model. Definition of the cardiac transcriptome and fetal gene program will facilitate systems biology studies of DCM in zebrafish.

JOURNAL OF THE AMERICAN HEART ASSOCIATION

**Key words:** dilated cardiomyopathy, transcriptome, fetal gene program, zebrafish

## Introduction

The identification of *DMD* (*Duchenne muscular dystrophy*) and *ACTC1* (*Actin, alpha cardiac muscle 1*) as the first causative genes for X-linked and autosomal-dominant dilated cardiomyopathy (DCM), respectively, opened the door for genetic studies of idiopathic heart failure.<sup>1,2</sup> Although mutations in dozens of genes have been linked to DCM,<sup>3</sup> current genetic testing panels only have a 37% yield.<sup>4</sup> Therefore, the discovery of novel DCM genes and/or modifier genes for cardiomyopathy remains a major challenge. The rapid advance of genomic technologies, such as genomewide linkage analysis, genomewide association studies, whole-exome sequencing, and RNA sequencing (RNA-seq), have accelerated the discovery process. Several candidate genes typically result from such studies, which necessitates further experimental validation and mechanistic studies. Mouse is the most prevalent animal model. However, the high cost of mouse and other mammalian models imposes substantial restrictions. More affordable alternative vertebrate animal models with higher throughput are desirable.

Zebrafish (*Danio rerio*) is a nonmammalian vertebrate model widely used to study developmental genetics and functional genomics. Genetic resources and tools with higher throughput create novel research opportunities for cardiomyopathy, including 1) the capacity to conduct large-scale mutagenesis screening using as mutagens N-ethyl-N-nitrosourea,<sup>5</sup> virus,<sup>6</sup> or transposons<sup>7</sup>; 2) the complete sequence of the zebrafish genome; 3) the development of TILLING technology (targeting induced local lesions in genomes), which has been used to generate mutations for about half the genome ([http://www.sanger.ac.uk/Projects/D\\_rerio/zmp/](http://www.sanger.ac.uk/Projects/D_rerio/zmp/))<sup>8</sup>; 4) morpholino technology, which can be used to quickly knock down genes during embryogenesis<sup>9</sup>; and 5) genome editing technology using TALENs (transcription activator-like effector nucleases) and/or CRISPRs (clustered regularly interspaced short palindromic repeats),

which can be used to generate targeted gene knockouts, conditional gene knockouts, large-fragment genome deletions, or gene knockins.<sup>10</sup>

The positional cloning of *titin* and *tnnt2* as causative genes for *pickwick* and *silent heart*, 2 embryonic lethal mutants identified from an N-ethyl-N-nitrosourea–based mutagenesis screen, initiated efforts to apply zebrafish as a model for studying human cardiomyopathy.<sup>11,12</sup>

Additional studies in zebrafish embryos have been conducted to annotate functions of known cardiomyopathy genes, such as *actn2*, *myh*, *myl*, and *lamn*,<sup>13-15</sup> to discover new cardiomyopathy genes such as *nexilin*, *lama4*, and *ilk*,<sup>16-18</sup> to mimic the cardiac remodeling process,<sup>19</sup> and to screen compounds of potential therapeutic value.<sup>20</sup> However, fish embryos cannot be used to recapitulate the full spectrum of human cardiomyopathy, a disease progressing from an initial compensated phase to a later decompensated stage. Accordingly, adult zebrafish models for cardiomyopathy have been recently pursued. Cardiomyopathy-like phenotypes have been reported in adult fish stressed by either chronic anemia and/or doxorubicin.<sup>21,22</sup> However, there are still concerns about the conservation of zebrafish cardiomyopathy models, and gene-based adult models have yet to be generated.

Toward the goal of establishing adult zebrafish as a vertebrate model for large-scale genetic studies of cardiomyopathy, we conducted transcriptome studies of zebrafish heart and assessed the conservation of the zebrafish model by seeking zebrafish orthologues of human DCM-associated genes.<sup>3,23</sup> In mammals, many fetal genes, which are quiescent in the adult stages but can be reactivated during heart failure, have been used as molecular markers for the pathogenesis of cardiomyopathy.<sup>24</sup> Therefore, we also defined the cardiac transcriptome in both larva and adult zebrafish and conducted differential expression analysis between larva and adult heart.

## **Materials and Methods**

### **Fish Husbandry**

Wild-type WIK fish were used for this study. The study was approved by the Mayo Clinic Institutional Animal Care and Use Committee.

### **RNA Preparation**

Fifty hearts from zebrafish larvae 4 days post fertilization (dpf) were dissected and pooled. This stage was selected because of the maturity of heart structures and the accessibility of the hearts for surgical removal. Five hearts consisting of both atrium and ventricle were dissected and pooled from 6-month-old WIK fish. Muscle samples consisting of both fast-twitch and slow-twitch fibers were dissected from an adult fish. Tissues were homogenized using a mortar and pestle (Fisher Scientific), and total RNA was extracted using TRIzol (Sigma) according to the manufacturer's instructions. RNA quality was assessed using a 2100 Bioanalyzer Instrument (Agilent Technologies) in the Mayo DNA Sequencing Core Facility.

### **Preparation of Libraries**

RNA libraries were prepared according to the manufacturer's instructions for the TruSeq RNA Sample Prep Kit v2 (Illumina). The liquid-handling EpMotion 5075 robot (Eppendorf) was used for TruSeq library construction. All AMPure bead (Beckman Coulter) clean up, mRNA isolation, end repair, and A-tailing reactions were completed on the 5075 robot. Reverse transcription and adaptor ligation steps were performed manually. The adaptor-modified DNA fragments were then enriched by 12 cycles of polymerase chain reaction (PCR) using primers included in the Illumina Sample Prep Kit. Concentration and size distribution of the libraries were determined on an Agilent Bioanalyzer DNA 1000 chip. Sample concentration was confirmed using Qubit fluorometry (Invitrogen). Libraries were loaded onto paired-end flow cells at concentrations of 8

to 10 pM to generate cluster densities of 700,000/mm<sup>2</sup> following Illumina's standard protocol using the Illumina cBot and cBot Paired-End Cluster Kit version 3. The flow cells were sequenced as 51×2 paired-end reads on an Illumina HiSeq 2000 using TruSeq SBS Sequencing Kit version 3 and HCS v2.0.12 data collection software. Base-calling was performed using Illumina's RTA version 1.17.21.3.

### **Mapping of Sequence Reads**

The generated FASTQ sequence reads from an Illumina HiSeq instrument were aligned to the latest available zebrafish genome assembly (Zv9) by TopHat.<sup>25</sup> At most, 2 mismatches were allowed for the first 32 bases in each alignment. Reads with more than 2 mismatches or that mapped to multiple genomic locations (an alignment score <4) were deleted. In all, 32,677 genes were annotated in Ensembl Zv9. The raw read counts for genes were generated by HTSeq (<http://www-huber.embl.de/users/anders/HTSeq/doc/overview.html>) for further downstream analyses.

JOURNAL OF THE AMERICAN HEART ASSOCIATION

### **Differential Gene Expression Analysis**

For analysis of differential gene expression, we eliminated genes without any reads across all samples. Statistical testing was done using the R package DESeq.<sup>26</sup> Because the primary goal of our analysis was to explore the underlying cause of differentially expressed genes between different tissues, an adjusted *P* value/false discovery rate (to adjust for multiple testing using the Benjamin-Hochberg method) cutoff of 0.01 was used to select significantly changed genes. In addition, we used the following 2 criteria to identify genes differentially expressed in embryo and adult: 1) the number of reads per kilobase per million reads (RPKM) for the gene was  $\geq 0.3$  in either the embryonic transcriptome or the adult transcriptome; and 2) the change in the expression level was at least 2-fold.

### Functional Annotation Bioinformatics Microarray Analysis (DAVID)

(<http://david.abcc.ncifcrf.gov/home.jsp>) was used to assign genes into pathway categories.<sup>27</sup>

### Quantitative Reverse Transcriptase PCR

The Superscript III First-Strand Synthesis System (Invitrogen) was used to generate cDNA from 500 ng RNA. Quantitative reverse transcriptase PCR (qPCR) was carried out using a Roche LightCycler 480 QPCR apparatus in 96-well QPCR plates (Roche Diagnostics Corp). The expression of the genes was normalized using the expression level of *gapdh* or *actb2* by  $-\Delta\Delta C_t$  (cycle threshold) values. Nine RNA samples (3 each for embryo heart, adult heart, and adult muscle) were analyzed in triplicate by qPCR. The primers are listed in Supplemental Table 1.

### Data Analysis

We used reads per kilobase of transcript per million mapped reads (RPKM) as the normalization method to calculate gene expression in each library of each tissue. In the differential gene expression analysis, the R package DESeq was used to normalize the gene raw read counts by considering both library size and expression distribution. To overcome the overdispersion problem in RNA-seq data, a modified negative binomial distribution model was used.

## Results

### Definition of Cardiac Transcriptome in a Zebrafish Heart

Using the standard paired-end RNA-seq protocol, we obtained more than 74, 114, and 130 million reads for embryonic hearts, adult hearts, and adult muscles, respectively (Supplemental Table 2). More than 75% of reads could be mapped to the Zv9 zebrafish genome. The reads were highly consistent within the 3 biological repeats for each experimental condition, as indicated by the correlation analysis (Supplemental Figure 1).

Two previous transcriptome studies used RPKM cutoffs of 3 or greater<sup>28</sup> or 0.3<sup>29</sup> to delineate expression levels in the heart. Using the cutoff of 3 RPKM, 5,345 genes, or 16% of the 32,677 genes in the zebrafish genome, met the criteria in an adult zebrafish heart, and 6,169 genes, or 19% of the genome, met the criteria in the embryonic zebrafish heart. Using the cutoff of 0.3 RPKM, 14,797 genes or 45% of the genome and 15,217 genes or 47% of the genome are expressed in an adult heart and an embryonic heart, respectively. Previously, it has been shown that the 200 most abundant mRNAs in mouse heart, which account for less than 1% of all 25,000 mouse gene transcripts, make up approximately 65% of the total cardiac mRNA pool.<sup>30</sup> In zebrafish, the 200 most abundant genes made up about 66% and 61% of the total mRNA pool in the embryonic heart and the adult heart, respectively.

Using differential gene expression analysis, we identified 2,795 upregulated genes that exhibit high expression in the embryonic heart but low expression in the adult heart and 3,175 downregulated genes with low expression in the embryonic heart but high expression in the adult heart. Among the upregulated genes, KEGG (Kyoto Encyclopedia of Genes and Genomes) pathway analysis identified several related to cell cycle and DNA replication (Supplemental Table 3) ( $P < .05$ ). The downregulated pathways ( $P < .05$ ) included those involved in carbohydrate metabolism (Supplemental Table 3). We also discovered decreased expression of genes in the calcium signaling pathway at 4 dpf, which were activated in adult heart (Supplemental Table 4). Some of these genes were orthologues of known “fetal genes” involved in calcium handling,<sup>31</sup> including *atp2a2a* (orthologue of *SERCA2A*,  $-3.57$ -fold change), *slc8a1a* (orthologue of *NCX1*,  $-2.46$ -fold change), and *slc8a2a* (orthologue of *NCX2*,  $-5.62$ -fold change).

In mammals, the expression of some sarcomeric genes switches from fetal to adult isoforms after birth. Similarly, in zebrafish we detected 25 genes with high expression in the



larval stage that were downregulated at the adult stage (Supplemental Table 5A) and 17 genes with low expression during the embryonic stage that were upregulated at the adult stage (Supplemental Table 5B). qPCR analysis of 11 genes in each group (Supplemental Figure 2A) showed high correlation with the fold changes.

### Identification of Zebrafish Homologues of 51 DCM-Associated Genes

Previous human genetic studies suggested 51 genes as causing or conferring susceptibility to inheritable DCM.<sup>3,23,32</sup> Our survey of the orthology data in the zfin Data report ([http://zfin.org/downloads/human\\_orthos.txt](http://zfin.org/downloads/human_orthos.txt)) and Ensembl (<http://www.ensembl.org/index.html>) identified zebrafish homologues for 46 of these genes. For the 5 DCM genes that did not have a clear homologue, we searched either the literature or the NCBI database for further information. Results were found for 3 of these genes. For the human gene *SCN5A*, *scn5laa* and *scn5lab* have been suggested as orthologues in zebrafish<sup>33</sup>; these are currently named *scn12aa* and *scn12ab*, respectively, in Ensembl. Ensembl suggests that *dsc2l* may be the zebrafish orthologue of Desmocollin 2.<sup>34</sup> Although 3 *DSC* genes exist in humans that exhibit tissue-specific expression patterns (*DSC1*, *DSC2*, and *DSC3*), there is only 1 *dsc2l* gene in zebrafish. Although no zebrafish orthologue of phospholamban was suggested from either zfin or Ensembl, a phospholambanlike gene (NM\_001201561.1) was annotated in the NIH database (<http://www.ncbi.nlm.nih.gov/nuccore>) which exhibits 50% protein identity to the human counterpart. Insufficient information was found for the other 2 genes. There are several candidate zebrafish homologues for *FOXD4*, but the closest homologue is *foxd5*. Because the gene is indicated as a potential orthologue with a low confidence score in Ensembl, we consider the zebrafish orthologue of *FOXD4* to remain unclear. Finally, we found no zebrafish orthologue for cardiotrophin 1, which might encode a cytokine that only exists in mammals.

Of the 49 total zebrafish homologues for human DCM genes that we identified, 30 had a single orthologue in zebrafish. Identities of the proteins encoded by these orthologues ranged from 10.14% to 86.73% (mean, 59%) (Table 1). The other 19 DCM genes had multiple zebrafish homologues (Supplemental Table 6): 14 with 2 homologues and 5 with 3 or more homologues.

### **Assessment of Cardiac Abundance of the 30 DCM Genes With a Single Orthologue**

It is posited that genes with higher abundance in a particular organ must have important roles in this organ. This abundance hypothesis motivated efforts to generate a cardiac expressed sequence tag collection,<sup>35</sup> to define genes with higher expression levels in the heart via RNA-seq analysis,<sup>28</sup> and to enrich cardiac mutant lines via an expression-based strategy.<sup>36</sup> Given that DCM-associated genes have been shown to have pivotal roles in cardiac diseases, we set out to test the abundance hypothesis by assessing the expression level of the 30 genes with a single zebrafish orthologue.

When RPKM  $\geq 0.3$  was used as the cutoff, 28 orthologues (93%) met the criteria in both adult and embryonic heart; *dmd* and *nebl* did not meet the criteria (Table 1). We then compared the expression level of the 30 DCM orthologues with those of the whole genome. The average RPKM value of the orthologues for the 30 DCM genes was significantly higher than that of the whole genome (mean,  $1.0 \times 10^{0.77}$  vs  $1.0 \times 10^{-0.33}$ ;  $P < .001$ ) in adult heart (Supplemental Figure 3A). Similarly, the average expression level of the orthologues for the 30 genes was significantly higher in embryonic heart than in the whole genome (mean,  $1.0 \times 10^{0.56}$  vs  $1.0 \times 10^{-0.18}$ ) (Supplemental Figure 3B).

When RPKM  $\geq 3$  was used as the cutoff, 19 of 30 genes (57%) were considered highly expressed in adult heart, and 17 of 30 genes (63%) were highly expressed in embryo heart. Together, our expressional analysis of 30 DCM genes supports the abundance hypothesis.

Moreover, our data support that  $RPKM \geq 0.3$  is a reasonable cutoff to define the zebrafish cardiac transcriptome.

### **Prioritization of Zebrafish Homologues for 19 DCM-Associated Genes With Multiple Homologues**

To facilitate future genetic studies of the 19 DCM-associated genes with multiple homologues, we attempted to prioritize the corresponding 59 zebrafish homologues according to their cardiac expression profile. We applied the abundance hypothesis for this prioritization process—among multiple homologues of the same DCM-causative gene, the homologue with higher abundance in the heart is given higher priority. Moreover, we applied a cardiac enrichment hypothesis in our prioritization process—among multiple homologues of the same DCM gene, the homologue exhibiting higher expression in the heart than in the muscle was given higher priority.

By applying these 2 criteria to 28 homologues for the 14 DCM genes with 2 homologues, we could prioritize 1 homologue over the other for 10 DCM genes (Table 2) if the combined score for these candidate genes was determined to be more than 5, which was our arbitrary cutoff value. However, we could not prioritize homologues for the other 4 DCM genes, *ANKRD1*, *LDB3*, *TMPO*, and *TTN*. In contrast to cardiac expression of *ANKRD1* in human, the expression of both *ankrd1a* and *ankrd1d* was low in zebrafish heart ( $RPKM < 0.3$ ). For *LDB3* and *TTN*, both *ldb3a/b* and *ttna/b* were enriched in the muscle but not in the heart. For *TMPO*, both *tpmoa* and *tpmob* had comparable cardiac and skeletal expression levels. Thus, more experiments are needed to determine if their functions are redundant in DCM pathogenesis.

We then applied the 2 criteria to analyze 31 homologues for the 5 DCM genes with 3 or more homologues (Table 2). Among the 3 homologues of *TNNT2*, only *tnnt2a* scored much higher than the others and thus is recommended. Compared with 3 *TNNI* homologues in

mammals, including *TnI-fast*, *TnI-slow*, and *TnI-cardiac*,<sup>37</sup> there are 14 troponin I homologues in zebrafish, including 2 tandem duplications of *tnni2a.1-4* and *tnni2b1-2*. None of them is assigned as the zebrafish *TNNI3* orthologue in the zfin database, whereas some of them are recommended by Ensembl with low confidence. According to our RNA-seq data, *tnni1b* was the major cardiac isoform with both high abundance and cardiac-enriched expression and thus is recommended. Our data also suggested that *tnni2a.3* and *tnni2b.2* were the 2 major skeletal muscle isoforms. No *ACTC1* orthologue is reported in the zfin database, and only *acta1b* is listed as an orthologue in Ensembl. Our RNA-seq data indicated that *actc1a* was the major actin isoform and *acta1b* was the minor isoform in both embryonic and adult hearts. In contrast, *actc1b* is a skeletal muscle-enriched isoform that accounts for 99.79% of total actin at the mRNA level in adult muscle. Therefore, both *actc1a* and *acta1b* should be considered when studying *ACTC1*-based DCM in zebrafish. qPCR of 10 genes in each condition showed high correlation of the fold changes between the 2 methods (Supplemental Figure 2B) and confirmed the relative expression of *TNNI3* and *ACTC1* homologues by semiquantitative reverse transcriptase PCR (Supplemental Figure 4).

### **Prioritization of Zebrafish Myosin Heavy Chain Homologues**

Zebrafish have 9 *MYH* homologues. Seven homologues share more than 80% protein identity with *MYH6* and *MYH7*, but *myh7ba* and *myh7bb* share 67% and 66% identities, respectively, with *MYH7* (Supplemental Table 6). In a 4 dpf embryonic heart, *myh6* (also termed *amhc*, *atrial myosin heavy chain*), *vmhc* (*ventricle myosin heavy chain*), and *vmhcl* (*ventricle myosin heavy chain like*) represent the 3 most abundant homologues (12.13%, 31.36%, and 53.36%, respectively), whereas in an adult heart, *vmhcl* contributes to 88% of the total *myh* transcripts. According to the cardiac enrichment hypothesis, *myh6* and *vmhcl* are highly enriched in heart

compared with muscle (Table 2, Figure 1A and B).

Because previous studies indicated that *myh6/amhc* expresses specifically in the atrium, while *vmhc* only expresses in the ventricle,<sup>15</sup> we checked chamber specificity for these promising *myh* homologues (Figure 1C). Consistent with its embryonic expression, *myh6/amhc* retained its atrium-restricted expression pattern and contributed to more than 90% of the myosin transcripts in atrium. *vmhcl* expressed specifically in the ventricle and contributed to more than 90% of the myosin transcripts in the ventricle. In contrast to its abundant expression in the embryonic ventricle, *vmhc* was almost undetectable (less than 0.5%) in either atrium or ventricle of the adult. The expression of *myh7ba* and *myh7bb* were also quite low (less than 5%) in both chambers.

In humans, both *MYH7* ( $\alpha$ -MHC) and *MYH6* ( $\beta$ -MHC) are expressed in myocardium and cause cardiomyopathy when mutated.<sup>38,39</sup> These genes are in tandem on chromosome 14, with *MYH6* located 5.3 kb downstream of *MYH7* (Figure 1D), and their expression is developmentally regulated. *MYH6* is mainly expressed in embryonic heart, whereas *MYH7* becomes the predominant adult isoform.<sup>40</sup> Similarly, mouse *Myh7* and *Myh6* are located in tandem on chromosome 14, with *myh6* located 5.3 kb downstream of *myh7*. Different from human, *Myh7* is mainly expressed in the embryonic rodent heart, whereas *Myh6* becomes the predominant adult isoform.<sup>41</sup>

In zebrafish, *vmhcl* and *vmhc* are located in tandem on chromosome 2, with *vmhc* approximately 4.4 kb downstream of *vmhcl*. Similar to that in human, *vmhc* mainly expresses in embryo, whereas *vmhcl* becomes the predominant adult isoform. To determine whether *vmhcl* and *vmhc* respond to cardiac stresses, we assessed their expression in doxorubicin-induced cardiotoxicity.<sup>21</sup> *vmhc* expression was significantly activated and peaked at 3 dpi, and *vmhcl* expression was decreased. The ratio of *vmhc/vmhcl* was increased by 25-fold compared with that

in an uninjected fish heart (Figure 2A). Consistent with fetal gene responses in mammals, we also detected gene activation for *nppa* and *nppb*, 2 established molecular markers for cardiac remodeling (Figure 2B), and downregulation of genes in calcium-handling pathways, including *pln*, *ryr2b*, *atp2a2*, and *slc8a1a*, after doxorubicin treatment (Figure 2C). Interestingly, *nppa* expression recovered to basal levels at 2 weeks post injection, whereas *nppb* remained activated at least until 3 weeks post injection.

## Discussion

### Transcriptome Analysis in a Zebrafish Heart

In this study, we defined the transcriptome of zebrafish heart. Analysis of the expression of zebrafish orthologues for 30 DCM-causative genes showed that more than 60% of the genes are in the top 16% for expression level, and 93% are in the top 45% for expression level. These data provide quantitative support to the abundance hypothesis; that is, genes with higher abundance in a particular organ have more important roles in that organ. Accordingly, the following strategy could be used to improve the efficiency of large-scale genetic studies of DCM. One could initially focus on  $\approx 5,000$  genes ( $\approx 16\%$  of the genome, identified using  $\text{RPKM} \geq 3$ ) as a pilot study, which is predicted to uncover about half of DCM-related genes. If successful, one could extend the study to the additional  $\approx 10,000$  genes ( $\approx 45\%$  of the genome, identified using  $\text{RPKM} \geq 0.3$ ) in an effort to uncover most of the remaining DCM-related genes.

By comparing the cardiac transcriptome of a 4 dpf larval fish and an adult fish, we defined the fetal gene program in a zebrafish heart. Among the approximately 5,000 genes we identified with differential expression, many upregulated genes and their related pathways reflect high cell proliferation in the larval stage. Our pathway analysis also uncovered activated genes in the Hedgehog and the TGF-beta signaling pathway (Supplemental Tables 7 and 8), which have

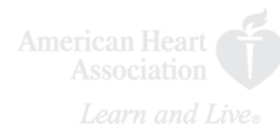

been implicated in cardiogenesis.<sup>42</sup> Several genes related to calcium handling and muscle contraction were identified, and their mammalian orthologues have been used as molecular markers for cardiac remodeling. Interestingly, we noted downregulated genes in carbohydrate metabolism in the larval stage, which differs from mammals.<sup>43</sup> This discrepancy probably reflects the difference between a zebrafish heart that develops *ex utero* and consumes the yolk composed of lipid and triacylglycerol and a mammalian heart that develops *in utero* and mainly consumes glucose delivered via the circulating blood.

### Transcriptome Analysis Facilitates the Prioritization of DCM-Associated Genes in

#### Zebrafish

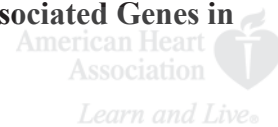

Of the 51 human DCM-associated genes, 19 had more than 1 homologue in zebrafish. Because of a genome duplication event in teleost fish,<sup>44</sup> approximately 15% (3,105/20,479) of human genes have more than 1 orthologue in zebrafish. We applied the cardiac abundance hypothesis to assess the expression of different homologues for each DCM-associated gene, which appears to be highly effective. The expression of *actn2*, *cryabb*, *desma*, *scn12ab*, *synbe2b*, and *tnnt2* contributes to more than 99% of the transcripts within the gene family, which strongly suggests their predominant roles in the heart. We also used the cardiac enrichment hypothesis to prioritize homologues, which partially reflects the subfunctionalization of the duplicated genes. Among the 59 fish homologues, 22 are cardiac-enriched genes and 20 are muscle-enriched genes; many of them exhibit more than 100-fold greater expression levels (Supplemental Table 9). By combining the 2 self-evident hypotheses, our scoring system allows us to effectively prioritize homologues for DCM genes, based on a combined score higher than 5. Although ultimate proof requires evidence from genetic manipulation of each homologue to model DCM pathogenesis, we advise starting with the recommended homologues.



Our systematic analysis of DCM-associated genes underscores the current status of the zfin database and Ensembl. Additional new homologues for the 51 DCM genes may be identified in the future. Some genes may be improperly annotated in the current genome. For example, *actc1b* should be renamed to reflect its identity as a skeletal muscle actin, not a cardiac actin, whereas *acta1a* and *acta1b* should be classified as cardiac muscle actins, not skeletal muscle actins. Combining the evidence from chromosome localization and cardiac expression profiles during development and cardiac stress, our data suggest *vmhcl* and *vmhc* as zebrafish functional orthologues for *MYH7* and *MYH6*, respectively. More experimental evidence is required, however, before they are annotated *myh7* and *myh6*, respectively, since no synteny was found between zebrafish and human (data not shown). Also, *amhc*, not the currently used *myh6* in zfin, is a more proper name for this atrium-specific homologue of *MYH*.

### Limitations

We did not observe developmental expression changes between *nppa* and *nppb* (1.84- and 1.44-fold changes between larval and adult stage, respectively), despite both genes being molecular markers for cardiomyopathy<sup>20-22</sup> and in DOX-induced cardiotoxicity (Figure 2B). This observation could be explained by dynamic expression of *nppa* and *nppb* during cardiogenesis, which peaks at day 2 and then decreases.<sup>20</sup> In the future, transcriptomes should be analyzed at more time points, especially during cardiogenesis. In addition, total RNA was extracted from whole hearts, which contain heterogeneous cell populations. It is plausible that genes with either cell type-specific or tissue-restrictive expression patterns are underrepresented. To address this concern, specific cell types could be isolated by fluorescence-activated cell sorting, which can then be subjected to RNA-seq analysis. Alternatively, single-cell-based RNA-seq technology can be explored.<sup>45</sup>



## **Zebrafish is a Conserved Model for Studying DCM**

Recently, it has been shown that 71.4% (14,623/20,479) of human protein-coding genes have at least 1 related zebrafish homologue and that 82% of human disease-associated genes have a zebrafish counterpart.<sup>46</sup> Here, we demonstrated that 96% of DCM-associated genes have corresponding homologues in zebrafish, supporting our central hypothesis that zebrafish is a conserved nonmammalian model suitable for studying cardiomyopathies. In fact, as a teleost fish, zebrafish is among the lowest-level vertebrate models with a chambered heart structure and conserved cellular layers including epicardium, myocardium, and endocardium.<sup>47</sup>

Our systematic identification and prioritization of fish homologues of DCM-associated genes will facilitate genetic studies in zebrafish, including the generation of gene-based DCM models. Besides mutants that have already been generated by TILLING, mutants for the remaining genes can be easily generated by using TALEN and/or CRISPR genome editing technology.<sup>10</sup> It is anticipated that the efficient zebrafish model will contribute to the validation of genetic variants discovered in human patients, the elucidation of pathological pathways, and the development of novel therapeutics for DCM.

**Acknowledgments:** We thank Christopher Kolbert, Bruce Eckloff, and Vernadette Simon at the Mayo Medical Genome Facility Gene Expression Core for conducting RNA-seq experiments, and Beninio Gore and Kashia Stragey for zebrafish maintenance.

**Funding Sources:** This work was supported in part by funds from the NIH (HL81753 and HL107304 to X.X., P30 CA 134274-04 to Y.Z.) and the Mayo Foundation (to X.X.).

**Conflict of Interest Disclosures:** None.

**References:**

1. Muntoni F, Cau M, Ganau A, Congiu R, Arvedi G, Mateddu A, et al. Brief report: deletion of the dystrophin muscle-promoter region associated with X-linked dilated cardiomyopathy. *N Engl J Med*. 1993;329:921-925.
2. Olson TM, Michels VV, Thibodeau SN, Tai YS, Keating MT. Actin mutations in dilated cardiomyopathy, a heritable form of heart failure. *Science*. 1998;280:750-752.
3. McNally EM, Golbus JR, Puckelwartz MJ. Genetic mutations and mechanisms in dilated cardiomyopathy. *J Clin Invest*. 2013;123:19-26.
4. Pugh TJ, Kelly MA, Gowrisankar S, Hynes E, Seidman MA, Baxter SM, et al. The landscape of genetic variation in dilated cardiomyopathy as surveyed by clinical DNA sequencing. *Genet Med*. 2014;16:601-608.
5. Stainier DY, Fouquet B, Chen JN, Warren KS, Weinstein BM, Meiler SE, et al. Mutations affecting the formation and function of the cardiovascular system in the zebrafish embryo. *Development*. 1996;123:285-292.
6. Amsterdam A, Nissen RM, Sun Z, Swindell EC, Farrington S, Hopkins N. Identification of 315 genes essential for early zebrafish development. *Proc Natl Acad Sci USA*. 2004;101:12792-12797.
7. Clark KJ, Balciunas D, Pogoda HM, Ding Y, Westcot SE, Bedell VM, et al. In vivo protein trapping produces a functional expression codex of the vertebrate proteome. *Nat Methods*. 2011;8:506-515.
8. Delvecchio C, Tiefenbach J, Krause HM. The zebrafish: a powerful platform for in vivo, HTS drug discovery. *Assay Drug Dev Technol*. 2011;9:354-361.
9. Nasevicius A, Ekker SC. Effective targeted gene 'knockdown' in zebrafish. *Nat Genet*. 2000;26:216-220.
10. Campbell JM, Hartjes KA, Nelson TJ, Xu X, Ekker SC. New and TALENted genome engineering toolbox. *Circ Res*. 2013;113:571-587.
11. Xu X, Meiler SE, Zhong TP, Mohideen M, Crossley DA, Burggren WW, et al. Cardiomyopathy in zebrafish due to mutation in an alternatively spliced exon of titin. *Nat Genet*. 2002;30:205-209.
12. Sehnert AJ, Huq A, Weinstein BM, Walker C, Fishman M, Stainier DY. Cardiac troponin T is essential in sarcomere assembly and cardiac contractility. *Nat Genet*. 2002;31:106-110.
13. Yang J, Xu X.  $\alpha$ -Actinin2 is required for the lateral alignment of Z discs and ventricular chamber enlargement during zebrafish cardiogenesis. *FASEB J*. 2012;26:4230-4242.

14. Chen Z, Huang W, Dahme T, Rottbauer W, Ackerman MJ, Xu X. Depletion of zebrafish essential and regulatory myosin light chains reduces cardiac function through distinct mechanisms. *Cardiovasc Res*. 2008;79:97-108.
15. Berdougo E, Coleman H, Lee DH, Stainier DY, Yelon D. Mutation of weak atrium/atrial myosin heavy chain disrupts atrial function and influences ventricular morphogenesis in zebrafish. *Development*. 2003;130:6121-6129.
16. Hassel D, Dahme T, Erdmann J, Meder B, Hüge A, Stoll M, et al. Nexilin mutations destabilize cardiac Z-disks and lead to dilated cardiomyopathy. *Nat Med*. 2009;15:1281-1288.
17. Knoll R, Postel R, Wang J, Kratzner R, Hennecke G, Vacaru AM, et al. Laminin-alpha4 and integrin-linked kinase mutations cause human cardiomyopathy via simultaneous defects in cardiomyocytes and endothelial cells. *Circulation*. 2007;116:515-525.
18. Musso G, Tasan M, Mosimann C, Beaver JE, Plovie E, Carr LA, et al. Novel cardiovascular gene functions revealed via systematic phenotype prediction in zebrafish. *Development*. 2014;141:224-235.
19. Yang J, Hartjes KA, Nelson TJ, Xu X. Cessation of contraction induces cardiomyocyte remodeling during zebrafish cardiogenesis. *Am J Physiol Heart Circ Physiol*. 2014;306:H382-395.
20. Becker JR, Robinson TY, Sachidanandan C, Kelly AE, Coy S, Peterson RT, et al. In vivo natriuretic peptide reporter assay identifies chemical modifiers of hypertrophic cardiomyopathy signalling. *Cardiovasc Res*. 2012;93:463-470.
21. Ding Y, Sun X, Huang W, Hoage T, Redfield M, Kushwaha S, et al. Haploinsufficiency of target of rapamycin attenuates cardiomyopathies in adult zebrafish. *Circ Res*. 2011;109:658-669.
22. Sun X, Hoage T, Bai P, Ding Y, Chen Z, Zhang R, et al. Cardiac hypertrophy involves both myocyte hypertrophy and hyperplasia in anemic zebrafish. *PLoS One*. 2009;4:e6596.
23. Teekakirikul P, Kelly MA, Rehm HL, Lakdawala NK, Funke BH. Inherited cardiomyopathies: molecular genetics and clinical genetic testing in the postgenomic era. *J Mol Diagn*. 2013;15:158-170.
24. Oka T, Xu J, Molkentin JD. Re-employment of developmental transcription factors in adult heart disease. *Semin Cell Dev Biol*. 2007;18:117-131.
25. Abraham WT, Gilbert EM, Lowes BD, Minobe WA, Larrabee P, Roden RL, et al. Coordinate changes in Myosin heavy chain isoform gene expression are selectively associated with alterations in dilated cardiomyopathy phenotype. *Mol Med*. 2002;8:750-760.
26. Anders S, Huber W. Differential expression analysis for sequence count data. *Genome Biol*. 2010;11:R106.

27. Huang da W, Sherman BT, Tan Q, Collins JR, Alvord WG, Roayaei J, et al. The DAVID Gene Functional Classification Tool: a novel biological module-centric algorithm to functionally analyze large gene lists. *Genome Biol.* 2007;8:R183.
28. Lee JH, Gao C, Peng G, Greer C, Ren S, Wang Y, et al. Analysis of transcriptome complexity through RNA sequencing in normal and failing murine hearts. *Circ Res.* 2011;109:1332-1341.
29. Ramskold D, Wang ET, Burge CB, Sandberg R. An abundance of ubiquitously expressed genes revealed by tissue transcriptome sequence data. *PLoS Comput Biol.* 2009;5:e1000598.
30. Matkovich SJ, Zhang Y, Van Booven DJ, Dorn GW 2nd. Deep mRNA sequencing for in vivo functional analysis of cardiac transcriptional regulators: application to Galphaq. *Circ Res.* 2010;106:1459-1467.
31. Rajabi M, Kassiotis C, Razeghi P, Taegtmeier H. Return to the fetal gene program protects the stressed heart: a strong hypothesis. *Heart Fail Rev.* 2007;12:331-343.
32. Hershberger RE, Hedges DJ, Morales A. Dilated cardiomyopathy: the complexity of a diverse genetic architecture. *Nat Rev Cardiol.* 2013;10:531-547.
33. Chopra SS, Stroud DM, Watanabe H, Bennett JS, Burns CG, Wells KS, et al. Voltage-gated sodium channels are required for heart development in zebrafish. *Circ Res.* 2010;106:1342-1350.
34. Goonesinghe A, Luan XM, Hurlstone A, Garrod D. Desmosomal cadherins in zebrafish epiboly and gastrulation. *BMC Dev Biol.* 2012;12:1.
35. Ton C, Hwang DM, Dempsey AA, Tang HC, Yoon J, Lim M, et al. Identification, characterization, and mapping of expressed sequence tags from an embryonic zebrafish heart cDNA library. *Genome Res.* 2000;10:1915-1927.
36. Ding Y, Liu W, Deng Y, Jomok B, Yang J, Huang W, et al. Trapping cardiac recessive mutants via expression-based insertional mutagenesis screening. *Circ Res.* 2013;112:606-617.
37. Murphy AM, Jones L 2nd, Sims HF, Strauss AW. Molecular cloning of rat cardiac troponin I and analysis of troponin I isoform expression in developing rat heart. *Biochemistry.* 1991;30:707-712.
38. Carniel E, Taylor MR, Sinagra G, Di Lenarda A, Ku L, Fain PR, et al. Alpha-myosin heavy chain: a sarcomeric gene associated with dilated and hypertrophic phenotypes of cardiomyopathy. *Circulation.* 2005;112:54-59.
39. Kamisago M, Sharma SD, DePalma SR, Solomon S, Sharma P, McDonough B, et al. Mutations in sarcomere protein genes as a cause of dilated cardiomyopathy. *N Engl J Med.* 2000;343:1688-1696.

40. Lowes BD, Minobe W, Abraham WT, Rizeq MN, Bohlmeier TJ, Quaipe RA, et al. Changes in gene expression in the intact human heart. Downregulation of alpha-myosin heavy chain in hypertrophied, failing ventricular myocardium. *J Clin Invest.* 1997;100:2315-2324.
41. Lompre AM, Nadal-Ginard B, Mahdavi V. Expression of the cardiac ventricular alpha- and beta-myosin heavy chain genes is developmentally and hormonally regulated. *J Biol Chem.* 1984;259:6437-6446.
42. Chen W, Burgess S, Hopkins N. Analysis of the zebrafish smoothed mutant reveals conserved and divergent functions of hedgehog activity. *Development.* 2001;128:2385-2396.
43. Lehman JJ, Kelly DP. Gene regulatory mechanisms governing energy metabolism during cardiac hypertrophic growth. *Heart Fail Rev.* 2002;7:175-185.
44. Postlethwait JH, Yan YL, Gates MA, Horne S, Amores A, Brownlie A, et al. Vertebrate genome evolution and the zebrafish gene map. *Nat Genet.* 1998;18:345-349.
45. Ramskold D, Luo S, Wang YC, Li R, Deng Q, Faridani OR, et al. Full-length mRNA-Seq from single-cell levels of RNA and individual circulating tumor cells. *Nat Biotechnol.* 2012;30:777-782.
46. Howe K, Clark MD, Torroja CF, Torrance J, Berthelot C, Muffato M, et al. The zebrafish reference genome sequence and its relationship to the human genome. *Nature.* 2013;496:498-503.
47. Hu N, Yost HJ, Clark EB. Cardiac morphology and blood pressure in the adult zebrafish. *Anat Rec.* 2001;264:1-12.

**Table 1:** Human DCM-Associated Genes (n=30) With 1 Zebrafish Orthologue

| Human DCM-Associated Gene | Zebrafish Orthologue                                         | Ensembl Gene ID | Identity           | mRNA Expression, RPKM |             |              |       |
|---------------------------|--------------------------------------------------------------|-----------------|--------------------|-----------------------|-------------|--------------|-------|
|                           |                                                              |                 |                    | Embryo Heart          | Adult Heart | Adult Muscle |       |
| <i>ABCC9</i>              | The subunit SUR2A of cardiac ATP-sensitive potassium channel | <i>abcc9</i>    | ENSDARG00000015985 | 81.67%                | 3.37        | 24.61        | 4.27  |
| <i>BAG3</i>               | BCL2-associated athanogene 3                                 | <i>bag3</i>     | ENSDARG00000039486 | 32.52%                | 3.06        | 37.17        | 9.09  |
| <i>CAV3</i>               | Caveolin 3                                                   | <i>cav3</i>     | ENSDARG00000024141 | 73.51%                | 8.50        | 11.90        | 20.82 |
| <i>CSRP3</i>              | Muscle LIM protein                                           | <i>csrp3</i>    | ENSDARG00000069975 | 71.65%                | 82.04       | 125.24       | 0.30  |
| <i>DMD</i>                | Dystrophin                                                   | <i>dmd</i>      | ENSDARG00000008487 | 81.67%                | 0.37        | 0.24         | 7.80  |
| <i>DNAJC19</i>            | DnaJ(Hsp40) homolog, subfamily C, member 19                  | <i>dnajc19</i>  | ENSDARG00000044420 | 77.59%                | 8.05        | 5.92         | 12.07 |
| <i>DSC2</i>               | Desmocollin 2                                                | <i>dscl*</i>    | ENSDARG00000039677 | 30.00%                | 3.61        | 5.87         | 4.10  |
| <i>EMD</i>                | Emerin                                                       | <i>emd</i>      | ENSDARG00000095774 | 20.87%                | 4.37        | 2.18         | 1.11  |
| <i>EYA4</i>               | Eyes absent homolog 4                                        | <i>eya4</i>     | ENSDARG00000012397 | 76.06%                | 1.49        | 2.16         | 12.05 |
| <i>FKTN</i>               | Fukutin                                                      | <i>fktn</i>     | ENSDARG00000059437 | 64.44%                | 1.84        | 0.98         | 0.55  |
| <i>GATAD1</i>             | GATA zinc finger domain containing 1                         | <i>gatad1</i>   | ENSDARG00000027612 | 73.23%                | 2.50        | 1.18         | 0.57  |
| <i>ILK</i>                | Integrin-linked kinase                                       | <i>ilk</i>      | ENSDARG00000056964 | 86.73%                | 12.24       | 10.03        | 4.48  |
| <i>LAMA4</i>              | Laminin a-4                                                  | <i>lama4</i>    | ENSDARG00000020785 | 43.23%                | 13.40       | 7.77         | 6.71  |
| <i>LMNA</i>               | Lamin A/C                                                    | <i>lmna</i>     | ENSDARG00000013415 | 64.91%                | 1.91        | 2.31         | 4.27  |
| <i>LAMP2</i>              | Lysosome-associated membrane protein 2                       | <i>lamp2</i>    | ENSDARG00000014914 | 25.25%                | 10.10       | 26.71        | 6.49  |
| <i>MYBPC3</i>             | Myosin-binding protein C                                     | <i>mybpc3</i>   | ENSDARG00000011615 | 62.72%                | 198.23      | 464.24       | 4.47  |
| <i>MYPN</i>               | Myopalladin                                                  | <i>mypn</i>     | ENSDARG00000076485 | 43.31%                | 0.22        | 3.24         | 8.77  |
| <i>NEBL</i>               | Nebulette                                                    | <i>nebl</i>     | ENSDARG00000021200 | 10.14%                | 0.00        | 0.03         | 0.02  |
| <i>NEXN</i>               | Nexilin                                                      | <i>nexn</i>     | ENSDARG00000057317 | 57.04%                | 47.98       | 81.55        | 23.33 |
| <i>PKP2</i>               | Plakophilin-2                                                | <i>pkp2</i>     | ENSDARG00000023026 | 54.26%                | 1.11        | 3.06         | 1.07  |



**Table 1** (continued)

|                           |                                                          | mRNA Expression, RPKM             |                     |              |             |              |        |
|---------------------------|----------------------------------------------------------|-----------------------------------|---------------------|--------------|-------------|--------------|--------|
| Human DCM-Associated Gene | Zebrafish Orthologue                                     | Ensembl Gene ID                   | Identity            | Embryo Heart | Adult Heart | Adult Muscle |        |
| <i>PLN</i>                | Phospholamban                                            | <i>cardiac phospholamban-like</i> | ENSDARG00000069404  | 50.00%       | 96.91       | 290.34       | 1.91   |
| <i>PSEN1</i>              | Presenilin 1                                             | <i>psen1</i>                      | ENSDARG00000004870  | 53.70%       | 6.33        | 2.63         | 1.13   |
| <i>PSEN2</i>              | Presenilin 2                                             | <i>psen2</i>                      | ENSDARG00000015540  | 71.00%       | 2.91        | 1.74         | 2.50   |
| <i>RBM20</i>              | RNA binding protein 20                                   | <i>rbm20</i>                      | ENSDARG000000087769 | 40.00%       | 2.62        | 12.08        | 6.99   |
| <i>SDHA</i>               | Succinate dehydrogenase complex, subunit A, Flavoprotein | <i>sdha</i>                       | ENSDARG00000016721  | 80.00%       | 44.39       | 91.56        | 44.49  |
| <i>SGCD</i>               | delta-Sarcoglycan                                        | <i>sgcd</i>                       | ENSDARG00000009789  | 72.00%       | 4.46        | 2.95         | 6.86   |
| <i>TAZ</i>                | Tafazzin                                                 | <i>taz</i>                        | ENSDARG000000041421 | 60.27%       | 2.02        | 3.27         | 0.92   |
| <i>TCAP</i>               | Titin-cap or telethonin                                  | <i>tcap</i>                       | ENSDARG00000007344  | 40.12%       | 0.35        | 141.31       | 161.93 |
| <i>TPM1</i>               | $\alpha$ -Tropomyosin                                    | <i>tpm1</i>                       | ENSDARG000000087402 | 79.00%       | 16.84       | 1.64         | 78.93  |
| <i>VCL</i>                | Metavinculin                                             | <i>vcl</i>                        | ENSDARG000000044968 | 84.00%       | 2.98        | 6.75         | 7.90   |

Abbreviations: DCM, dilated cardiomyopathy; RPKM, reads per kilobase per million reads.

\* All human and zebrafish genes were 1-to-1 orthologues except *DSC2*, in which many human genes had 1 zebrafish orthologue.

**Table 2:** Cardiac Abundance and Cardiac Enrichment for Zebrafish Homologues of 19 Human DCM-Associated Genes

| Zebrafish Orthologue    | Abundance, % | Score * | Cardiac Enrichment | Score † |
|-------------------------|--------------|---------|--------------------|---------|
| <i>ACTC1</i>            |              |         |                    |         |
| <i>act1a</i>            | 1.32         |         | 128.55             | √√√√    |
| <i>act1b</i>            | 20.22        | √       | 248.67             | √√√√    |
| <i>hm:zewp0073</i>      | 3.77         |         | 157.02             | √√√√    |
| <i>actc1a</i>           | 74.58        | √√√     | 178.41             | √√√√    |
| <i>actc1b</i>           | 0.12         |         | 0.00               |         |
| <i>ACTN2</i>            |              |         |                    |         |
| <i>actn2</i>            | 99.66        | √√√√    | 258.31             | √√√√    |
| <i>CABZ01111872.1</i>   | 0.34         |         | 14.23              | √√√     |
| <i>ANKRD1</i>           |              |         |                    |         |
| <i>ankrd1a</i>          | 57.29        | √√      | 0.08               |         |
| <i>ankrd1b</i>          | 42.71        | √√      | 3.82               | √√      |
| <i>CRYAB</i>            |              |         |                    |         |
| <i>cryaba</i>           | 0.00         |         | NA                 |         |
| <i>cryabb</i>           | 100.00       | √√√√√   | 1.02               |         |
| <i>DES</i>              |              |         |                    |         |
| <i>desma</i>            | 99.96        | √√√√    | 2.68               | √√      |
| <i>desmb</i>            | 0.04         |         | 3.47               | √√      |
| <i>DSP</i>              |              |         |                    |         |
| <i>dspa</i>             | 35.55        | √       | 0.63               |         |
| <i>dspb</i>             | 64.45        | √√√     | 2.88               | √√      |
| <i>FHL2</i>             |              |         |                    |         |
| <i>fhl2a</i>            | 72.18        | √√√     | 7.99               | √√      |
| <i>fhl2b</i>            | 27.82        | √       | 9.28               | √√      |
| <i>LDB3</i>             |              |         |                    |         |
| <i>ldb3a</i>            | 22.08        | √       | 0.38               |         |
| <i>ldb3b</i>            | 77.92        | √√√     | 0.37               |         |
| <i>MYH6 and MYH7</i>    |              |         |                    |         |
| <i>myh6</i>             | 7.73         |         | 1082.61            | √√√√√   |
| <i>vmhc</i>             | 1.10         |         | 22.40              | √√√     |
| <i>vmhcl</i>            | 87.87        | √√√√    | 1784.02            | √√√√√   |
| <i>CR450736.2</i>       | 0.00         |         | 0.00               |         |
| <i>CU633479.5</i>       | 0.00         |         | 0.02               |         |
| <i>CU633479.6</i>       | 0.00         |         | 0.00               |         |
| <i>si:ch211-24n20.3</i> | 0.00         |         | 0.00               |         |
| <i>myh7ba</i>           | 3.00         |         | 10.62              | √√√     |
| <i>myh7bb</i>           | 0.30         |         | 8.73               | √√      |
| <i>PDLIM3</i>           |              |         |                    |         |
| <i>pdlim3a</i>          | 17.32        |         | 13.16              | √√√     |
| <i>pdlim3b</i>          | 82.68        | √√√√    | 6.19               | √√      |
| <i>SCN5A</i>            |              |         |                    |         |
| <i>scn12aa</i>          | 0.08         |         | 1.10               |         |
| <i>scn12ab</i>          | 99.92        | √√√√    | 111.39             | √√√√    |



**Table 2** (continued)

| Zebrafish Orthologue    | Abundance, % | Score* | Cardiac Enrichment | Score† |
|-------------------------|--------------|--------|--------------------|--------|
| <i>SYNE1</i>            |              |        |                    |        |
| <i>syne1a</i>           | 69.95        | √√√    | 3.38               | √√     |
| <i>syne1b</i>           | 30.05        | √      | 1.19               |        |
| <i>SYNE2</i>            |              |        |                    |        |
| <i>syne2a</i>           | 0.78         |        | 0.02               |        |
| <i>syne2b</i>           | 99.22        | √√√√   | 2.28               | √√     |
| <i>TMPO</i>             |              |        |                    |        |
| <i>tmpoa</i>            | 55.88        | √√     | 1.13               |        |
| <i>tmpob</i>            | 44.12        | √√     | 0.57               |        |
| <i>TNNC1</i>            |              |        |                    |        |
| <i>tnnc1a</i>           | 89.20        | √√√√   | 1639.25            | √√√√√  |
| <i>tnnc1b</i>           | 10.80        |        | 1.53               |        |
| <i>TNNI3</i>            |              |        |                    |        |
| <i>tnni1a</i>           | 0.05         |        | 0.55               |        |
| <i>tnni1al</i>          | 0.01         |        | 0.01               |        |
| <i>tnni1b</i>           | 68.57        | √√√    | 152.79             | √√√√   |
| <i>tnni1c</i>           | 0.30         |        | 0.03               |        |
| <i>tnni1d</i>           | 0.23         |        | 0.20               |        |
| <i>tnni2a.1</i>         | 0.03         |        | 0.10               |        |
| <i>tnni2a.2</i>         | 1.20         |        | 0.23               |        |
| <i>tnni2a.3</i>         | 0.18         |        | 0.00               |        |
| <i>tnni2a.4</i>         | 0.01         |        | 0.00               |        |
| <i>tnni2b.1</i>         | 0.00         |        | 0.01               |        |
| <i>tnni2b.2</i>         | 0.15         |        | 0.00               |        |
| <i>zgc:112242</i>       | 2.99         |        | 1.59               |        |
| <i>zgc:101560</i>       | 26.26        | √      | 60.47              | √√√    |
| <i>si:dkey-206m15.8</i> | 0.01         |        | 0.01               |        |
| <i>TNNT2</i>            |              |        |                    |        |
| <i>tnnt2a</i>           | 99.92        | √√√√   | 1427.04            | √√√√√  |
| <i>tnnt2b</i>           | 0.06         |        | 0.30               |        |
| <i>tnnt2c</i>           | 0.02         |        | 1.08               |        |
| <i>TTN</i>              |              |        |                    |        |
| <i>ttna</i>             | 57.86        | √√     | 0.26               |        |
| <i>ttnb</i>             | 42.14        | √√     | 0.17               |        |

Abbreviations: DCM, dilated cardiomyopathy; NA, not applicable.

\* The abundance is defined as the percentage of expression level for each homologue among all homologues for the same DCM-causative gene (ie, RPKM of 1 homologue/[sum of RPKM of all homologues for the same DCM-causative gene]). The percentage of a homologue more than 20%, 40%, 60%, 80%, or 100% is assigned an abundance priority score of 1 (√) through 5 (√√√√√), respectively.

† The score for cardiac enrichment is calculated by the ratio of RPKM in heart to that in muscle. A ratio more than 2-, 10-, 100-, or 1,000-fold is assigned an enrichment priority score of 2 (√√) through 5 (√√√√√), respectively.

**Figure Legends:**

**Figure 1:** Expressional Analysis of *MYH* Homologues in Zebrafish. A, Heat map of the average expression in  $\log_{10}$ (reads per kilobase per million reads [RPKM]) for *myh6/amhc*, *vmhc*, *vmhcl*, *myh7ba*, *myh7bb*, and *myhc4* (muscle-specific *myh*) in embryo heart, adult heart, and adult muscle. B, Validation of the RNA sequencing data in (A) showing expression levels using semiquantitative reverse transcriptase polymerase chain reaction (semi-qPCR). *gapdh* was used as control. C, Expression of *myh6/amhc*, *vmhc*, *vmhcl*, *myh7ba*, and *myh7bb* in adult atrium and ventricle as a percentage of total expression level from qPCR, normalized to the expression of *gapdh*. D, Schematics of genomic region for *MYH6/MYH7* homologues in human, mice, and zebrafish. Chr indicates chromosome.

**Figure 2:** Transcripts of *vmhc* and *vmhcl* Respond to Doxorubicin. Adult zebrafish were injected with doxorubicin (20 mg/g), and gene expression in ventricle was determined using qPCR at 1 day, 3 days, 1 week, 2 weeks, and 3 weeks after injection. The expression level was normalized to that of *actb2*. Shown are expression levels of *vmhc* and *vmhcl* (A), *nppa* and *nppb* (B), and *pln*, *ryr2b*, *atp2a2*, and *slc8a1a* (C). In A, the ratio of *vmhc* to *vmhcl* was increased compared with that in an uninjected fish heart (green line), right scale. dpi indicates days post injection; wpi, weeks post injection. N=3 in each experimental group.

A

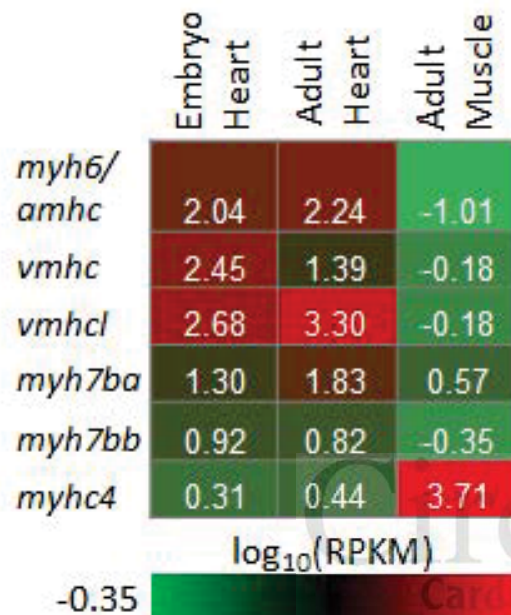

B

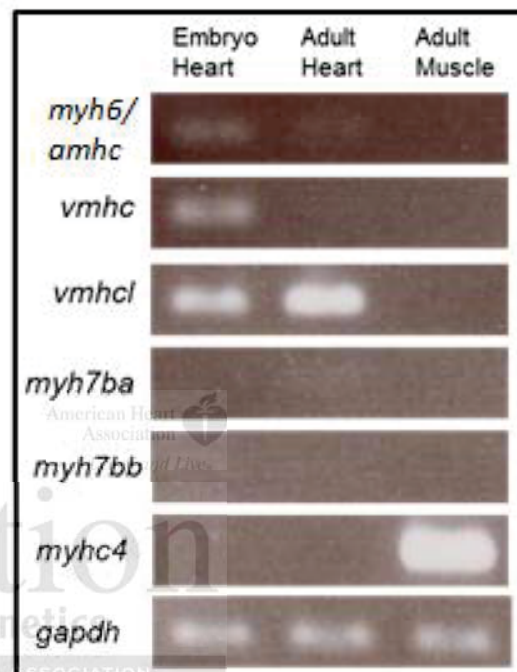

C

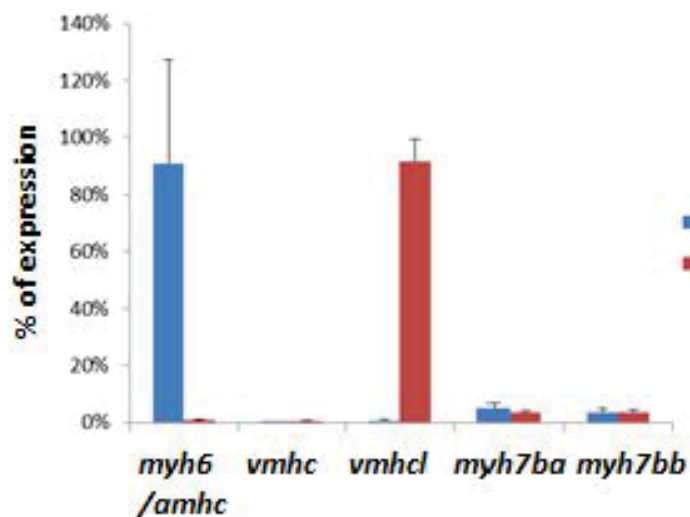

D

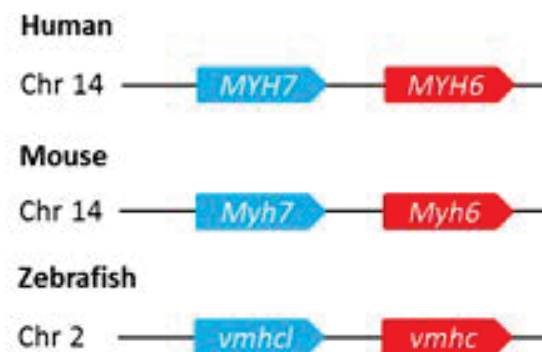

A

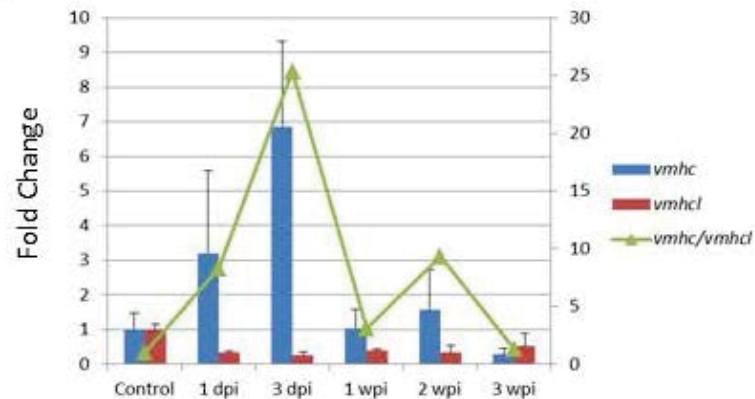

B

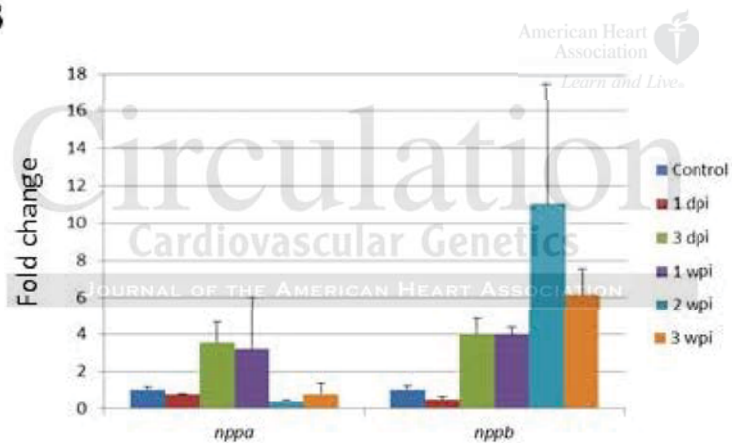

C

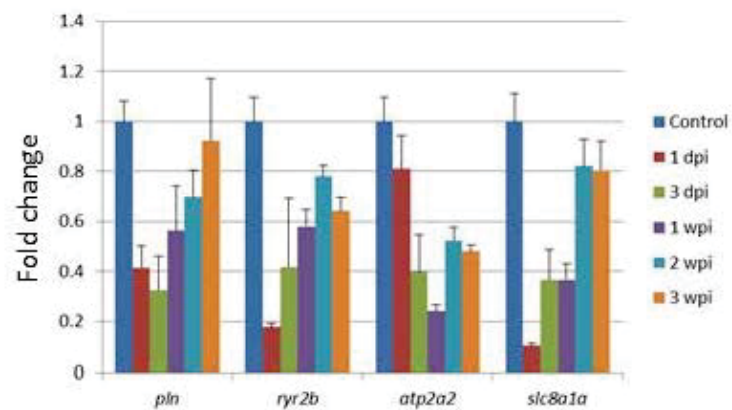

Supplement: NIHMS657636-supplement-000702_-_PAP.pdf [file NIHMS657636-supplement-000702_-_PAP.pdf]
