# Supplementary material
Source: PubMed Central journal article supplement (PMC4406804)
Supplement: NIHMS657636-supplement-000702_-_Supplemental_Material.pdf [file NIHMS657636-supplement-000702_-_Supplemental_Material.pdf]

**Supplemental Table 1: Primers list for Quantitative reverse transcriptase polymerase chain reaction (qPCR)**

|                    | <b>Forward</b>           | <b>Reverse</b>           | <b>Note</b> |
|--------------------|--------------------------|--------------------------|-------------|
| <i>acta1b</i>      | atgtgtgacgacgaggagac     | tgctctgagcctcatcacct     | *           |
| <i>actb2</i>       | ggtatcgtgatggactctgg     | tctcctgctcaaagtcaagg     |             |
| <i>hm:zewp0073</i> | tattggaaatgagcgtttccgt   | cagcgatacctggatacata     |             |
| <i>actc1a</i>      | gtggctctggactttgagaat    | gatccttgccgatatcaatg     | *           |
| <i>actc1b</i>      | atgtgtgacgacgaggagac     | tgctctgagcctcatcacct     | †           |
| <i>actn2</i>       | cttccatgtcagctggaaggatgg | gcagtttcagcctgctcagctc   | †           |
| <i>atp2a2a</i>     | atcggtaaagatccgtgatga    | cacggcgatctgaagtgt       |             |
| <i>cmlc1</i>       | aaagtggaaccaagaaac       | tcatcacatcctccactgg      | *           |
| <i>gapdh</i>       | ccacctatggaaagtacaag     | ctctcttgcaccacctta       | † *         |
| <i>myh6</i>        | tgaagacctgagaaggcaac     | cagttcctcggttctctgaa     |             |
| <i>myh7ba</i>      | gcctgaacttctgacatgc      | ctccctctgcttctgttga      |             |
| <i>myh7bb</i>      | gaactcaagacatgctgct      | ttgaactcatgttgccaaa      |             |
| <i>myhc4</i>       | tctgctgggtactcttgagg     | ccaacttttctcggctca       |             |
| <i>myl1</i>        | aacccaaacaaggcaacata     | gtgttgacgaaagcctcat      | †           |
| <i>myl6</i>        | atgtctgacttcaggagga      | actgctcaaagtccagcatc     | *           |
| <i>mylz3</i>       | actgctgaccagattgagga     | caggaaagcctcaaagtcaa     | †           |
| <i>nppa</i>        | gatgtacaagcgcacacgtt     | tctgatgcctcttctgttgc     |             |
| <i>nppb</i>        | catgggtgttttaaagttctcc   | cttcaatattgccgcctttac    |             |
| <i>pcna</i>        | aggcaacatcaagctctcac     | atttgacgtgtcccatgtct     | †           |
| <i>pln-like</i>    | aaggtgcagcacatgacac      | ccgtggaaagagattagcaa     |             |
| <i>ryr2b</i>       | cgagacaaagctcaggatgt     | ttcgtgagggactctttcag     |             |
| <i>slc8a1a</i>     | agaggcgtattgctgaaatg     | tttcttggccacactcttc      |             |
| <i>tcap</i>        | gggaggaaaacccaaataagag   | tggagaggacgcacctgcca     | † *         |
| <i>tnnc2</i>       | actgacgcgcaacagga        | ctgccgtctcatcgacct       | †           |
| <i>tnnt2c</i>      | gaccgaacgtgagaagaaga     | aggacttctgtgtgttttc      | *           |
| <i>tpm4b</i>       | acaacacagctggaaaacgag    | tctgaatttccattttctcc     | *           |
| <i>ttna</i>        | aaaactggcagaaatgctc      | gtcgactttctcgaggttca     | † *         |
| <i>ttnb</i>        | tgggaaatgcctcttattga     | gatgacttcgccagaacta      | † *         |
| <i>tuba1b</i>      | gagaaggcttaccatgagca     | gttgatgccaaccttgaaac     | †           |
| <i>vmhc</i>        | tcagatggcagagttggag      | gcttcctttacagttacagctttc | †           |
| <i>vmhcl</i>       | gcgatgctgaaatgtctgtt     | cagtcacagtcttgcctcct     | †           |

† : Primers used in Supplemental Fig. 2 A

\* : Primers used in Supplemental Fig. 2 B

**Supplemental Table 2: Number of reads obtained from RNA-seq results**

| Sample                         | Embryonic heart-1     | Embryonic heart-2     | Embryonic heart-3     | Adult heart-1         | Adult heart-2         | Adult heart-3          | Adult muscle-1         | Adult muscle-2         | Adult muscle-3         |
|--------------------------------|-----------------------|-----------------------|-----------------------|-----------------------|-----------------------|------------------------|------------------------|------------------------|------------------------|
| Total Reads                    | 74,573,872            | 78,329,760            | 86,943,448            | 114,487,262           | 130,464,794           | 140,988,744            | 159,924,332            | 154,395,064            | 132,226,076            |
| Used Reads                     | 74,572,136            | 78,328,939            | 86,942,220            | 114,485,019           | 130,463,951           | 140,986,424            | 159,921,302            | 154,394,110            | 132,224,272            |
| Mapped Reads                   | 62,600,036<br>(83.9%) | 66,055,471<br>(84.3%) | 73,763,903<br>(84.8%) | 86,641,679<br>(75.7%) | 98,868,892<br>(75.8%) | 106,460,002<br>(75.5%) | 140,647,303<br>(87.9%) | 135,522,271<br>(87.8%) | 116,239,320<br>(87.9%) |
| Mapped with Exons              | 52,833,743<br>(70.8%) | 55,628,362<br>(71.0%) | 61,581,273<br>(70.8%) | 69,940,033<br>(61.1%) | 81,883,617<br>(62.8%) | 86,205,245<br>(61.1%)  | 107,495,382<br>(67.2%) | 102,397,109<br>(66.3%) | 88,805,249<br>(67.2%)  |
| Mapped with Exon-Exon Junction | 9,776,293<br>(13.1%)  | 10,427,109<br>(13.3%) | 12,182,630<br>(14.0%) | 16,701,646<br>(14.6%) | 16,985,275<br>(13.0%) | 120,254,757<br>(14.4%) | 33,151,921<br>(20.7%)  | 33,125,162<br>(21.5%)  | 27,434,071<br>(20.7%)  |
| Gene Count                     | 40,950,818<br>(54.9%) | 43,100,154<br>(55.0%) | 49,459,154<br>(56.9%) | 67,682,848<br>(59.1%) | 70,432,766<br>(54.0%) | 82,397,776<br>(58.4%)  | 119,792,094<br>(74.9%) | 116,758,278<br>(75.6%) | 98,720,406<br>(74.7%)  |

**Supplemental Table 3.** KEGG Pathway Analysis of Upregulated and Downregulated Pathways in Zebrafish Embryonic Heart

| <b>KEGG Pathway Term</b>   | <b>Gene Count</b> | <b><i>P</i> value*</b> |
|----------------------------|-------------------|------------------------|
| Upregulated                |                   |                        |
| Cell cycle                 | 60                | 7.50e-17               |
| DNA replication            | 30                | 5.80e-17               |
| Homologous recombination   | 18                | 1.10e-06               |
| Mismatch repair            | 16                | 1.40e-06               |
| Pyrimidine metabolism      | 36                | 1.20e-06               |
| Nucleotide excision repair | 21                | 1.90e-05               |
| ECM-receptor interaction   | 30                | 6.10e-05               |
| Purine metabolism          | 44                | 1.20e-04               |
| Basal cell carcinoma       | 21                | 7.50e-04               |
| Base excision repair       | 16                | 6.90e-04               |
| Pathways in cancer         | 74                | 7.20e-04               |
| p53 Signaling pathway      | 23                | 1.80e-03               |
| Spliceosome                | 35                | 1.80e-03               |
| TGF-beta signaling pathway | 26                | 4.50e-03               |
| Hedgehog signaling pathway | 19                | 6.40e-03               |
| Small cell lung cancer     | 24                | 1.40e-02               |
| Bladder cancer             | 14                | 4.60e-02               |
| Downregulated              |                   |                        |
| Glycolysis/gluconeogenesis | 34                | 1.20e-11               |
| Pyruvate metabolism        | 20                | 2.90e-05               |
| Fatty acid metabolism      | 19                | 1.10e-04               |
| Propanoate metabolism      | 16                | 3.20e-04               |

**Supplemental Table 3** (continued)

| <b>KEGG Pathway Term</b>                       | <b>Gene Count</b> | <b><i>P</i> value*</b> |
|------------------------------------------------|-------------------|------------------------|
| Insulin signaling pathway                      | 39                | 3.50e-04               |
| ABC transporters                               | 18                | 1.20e-03               |
| Fructose and mannose metabolism                | 14                | 9.50e-03               |
| Calcium signaling pathway                      | 42                | 1.00e-02               |
| Drug metabolism                                | 20                | 1.00e-02               |
| Hypertrophic cardiomyopathy                    | 24                | 1.80e-02               |
| Vascular smooth muscle contraction             | 29                | 1.90e-02               |
| Dilated cardiomyopathy                         | 25                | 2.00e-02               |
| Cardiac muscle contraction                     | 22                | 2.40e-02               |
| Valine, leucine, and isoleucine<br>degradation | 15                | 2.40e-02               |
| Citrate cycle (TCA cycle)                      | 12                | 2.50e-02               |
| Renal cell carcinoma                           | 20                | 2.90e-02               |
| Arginine and proline metabolism                | 16                | 4.80e-02               |

Abbreviations: ECM, extracellular matrix; KEGG, Kyoto Encyclopedia of Genes and Genomes; TGF, transforming growth factor.

\* A modified Fisher Exact *P* Value. Usually *P* Value is equal or smaller than 0.05 to be considered strongly enriched in the annotation categories.

## Supplemental Table 4: List of downregulated genes in calcium signaling pathway in embryonic heart

| Ensembl Gene ID     | Gene Name                                                                           | Fold change | P value  |
|---------------------|-------------------------------------------------------------------------------------|-------------|----------|
| ENSDARG00000069419  | <i>adcy9</i> adenylate cyclase 9                                                    | -2.01       | 1.50E-03 |
| ENSDARG00000058488  | <i>adora2ab</i> adenosine A2a receptor                                              | -2.60       | 3.92E-04 |
| ENSDARG00000041173  | <i>adra1bb</i> adrenergic, alpha-1B-, receptor                                      | -10.75      | 9.65E-03 |
| ENSDARG00000054510  | <i>adrb2b</i> adrenergic, beta-2-, receptor, surface                                | -18.46      | 8.77E-04 |
| ENSDARG00000029439  | <i>atp2a2a</i> ATPase, Ca <sup>++</sup> transporting, cardiac muscle, slow twitch 2 | -3.57       | 1.87E-10 |
| ENSDARG00000012684  | <i>atp2b1b</i> ATPase, Ca <sup>++</sup> transporting, plasma membrane 1             | -3.22       | 2.53E-03 |
| ENSDARG00000077083  | <i>AVPR1A</i> arginine vasopressin receptor 1A                                      | -3.04       | 1.24E-07 |
| ENSDARG00000037619  | <i>BX569798.1</i> GNAS complex locus                                                | -5.23       | 8.03E-06 |
| ENSDARG00000006923  | <i>cacna1ab</i> calcium channel, voltage-dependent, P/Q type, alpha 1A subunit      | -19.04      | 4.72E-35 |
| ENSDARG00000008398  | <i>cacna1c</i> calcium channel, voltage-dependent, L type, alpha 1C subunit         | -2.92       | 1.46E-07 |
| ENSDARG000000089913 | <i>cacna1g</i> calcium channel, voltage-dependent, T type, alpha 1G subunit         | -3.29       | 2.48E-09 |
| ENSDARG00000015050  | <i>calm2a</i> calmodulin 2a (phosphorylase kinase, delta)                           | -2.47       | 7.80E-06 |
| ENSDARG00000014273  | <i>camk2d2</i> calcium/calmodulin-dependent protein kinase II delta                 | -9.08       | 4.04E-26 |
| ENSDARG00000055577  | <i>chrm2a</i> cholinergic receptor, muscarinic 2                                    | -2.09       | 6.32E-03 |
| ENSDARG00000062262  | <i>ednrab</i> endothelin receptor type Ab                                           | -7.25       | 4.47E-22 |
| ENSDARG00000089334  | <i>ednrb1a</i> endothelin receptor B1a                                              | -3.16       | 7.77E-03 |
| ENSDARG00000086207  | <i>grin2da</i> glutamate receptor, ionotropic, N-methyl D-aspartate 2D              | -5.97       | 3.04E-11 |
| ENSDARG000000052425 | <i>hrh1</i> histamine receptor H1                                                   | -10.38      | 1.12E-03 |
| ENSDARG00000016095  | <i>htr6</i> 5-hydroxytryptamine (serotonin) receptor 6                              | -3.60       | 3.37E-03 |
| ENSDARG00000074149  | <i>ITPR1</i> inositol 1,4,5-triphosphate receptor, type 1                           | -4.48       | 1.73E-10 |
| ENSDARG00000026081  | <i>lhcg</i> luteinizing hormone/choriogonadotropin receptor                         | -335.67     | 2.45E-26 |
| ENSDARG00000031698  | <i>mylk2</i> myosin light chain kinase 2                                            | -4.18       | 3.94E-06 |
| ENSDARG00000076348  | <i>mylk3</i> myosin light chain kinase 3                                            | -5.33       | 9.61E-03 |
| ENSDARG00000026925  | <i>nos2a</i> nitric oxide synthase 2, inducible                                     | -4.13       | 4.22E-11 |
| ENSDARG00000044175  | <i>oxtrl</i> oxytocin receptor like                                                 | -4.20       | 2.74E-03 |
| ENSDARG00000004455  | <i>p2rx5</i> purinergic receptor P2X, ligand-gated ion channel, 5                   | -3.77       | 9.39E-05 |
| ENSDARG000000060875 | <i>PDE1A</i> phosphodiesterase 1A, calmodulin-dependent                             | -9.37       | 3.71E-27 |
| ENSDARG000000067683 | <i>PDE1C</i> phosphodiesterase 1C, calmodulin-dependent 70kDa                       | -70.97      | 3.82E-10 |
| ENSDARG00000030604  | <i>phkg1a</i> phosphorylase kinase, gamma 1a (muscle)                               | -2.49       | 2.41E-05 |
| ENSDARG00000069498  | <i>phkg1b</i> phosphorylase kinase, gamma 1b (muscle)                               | -3.71       | 1.63E-10 |
| ENSDARG00000090381  | <i>PLCB2</i> phospholipase C, beta 2                                                | -4.79       | 5.59E-08 |
| ENSDARG00000068763  | <i>plcg2</i> phospholipase C, gamma 2 (phosphatidylinositol-specific)               | -4.37       | 6.06E-09 |
| ENSDARG00000069404  | <i>pln-like</i> cardiac phospholamban-like                                          | -3.66       | 7.15E-11 |
| ENSDARG00000086250  | <i>PRKCA</i> protein kinase C, alpha                                                | -6.44       | 1.22E-05 |
| ENSDARG00000060716  | <i>prkx</i> protein kinase, X-linked                                                | -2.09       | 5.54E-03 |
| ENSDARG00000023797  | <i>ryr1b</i> ryanodine receptor 1 (skeletal)                                        | -7.15       | 7.49E-22 |
| ENSDARG00000003706  | <i>ryr2b</i> ryanodine receptor 2b                                                  | -3.35       | 3.44E-09 |
| ENSDARG00000071331  | <i>ryr3</i> ryanodine receptor 3                                                    | -3.08       | 3.35E-08 |
| ENSDARG00000027355  | <i>slc25a4</i> solute carrier family 25, member 4                                   | -5.30       | 2.93E-15 |
| ENSDARG00000092553  | <i>slc25a5</i> solute carrier family 25 alpha, member 5                             | -2.82       | 9.77E-07 |
| ENSDARG00000013422  | <i>slc8a1a</i> solute carrier family 8 (sodium/calcium exchanger), member 1a        | -2.47       | 8.02E-06 |
| ENSDARG00000008912  | <i>slc8a2a</i> solute carrier family 8 (sodium/calcium exchanger), member 2a        | -5.62       | 1.41E-11 |
| ENSDARG00000011400  | <i>tnnc1a</i> troponin C type 1 (slow)                                              | -2.52       | 6.07E-06 |
| ENSDARG00000037539  | <i>tnnc1b</i> troponin C type 1b (slow)                                             | -3.11       | 1.12E-07 |
| ENSDARG00000021564  | <i>VDAC3</i> voltage-dependent anion channel 3                                      | -2.20       | 2.46E-04 |

The fold change and adjusted *P* value were calculated by the R package DESeq in embryonic heart over that in adult heart.

## Supplemental Table 5: List of upregulated sarcomeric genes in a zebrafish embryonic and an adult heart

A

| Ensembl Gene ID     | Gene Name       | Embryonic heart                                            | Adult heart | Fold change | P value |          |
|---------------------|-----------------|------------------------------------------------------------|-------------|-------------|---------|----------|
| ENSDARG00000037840  | <i>actc1b</i>   | <i>actin, alpha, cardiac muscle 1b</i>                     | 134.43      | 6.89        | 16.12   | 1.28E-09 |
| ENSDARG00000001431  | <i>actn3b</i>   | <i>actinin, alpha 3b</i>                                   | 1.27        | 0.37        | 2.85    | 3.04E-03 |
| ENSDARG00000014196  | <i>myl1</i>     | <i>myosin, light chain 1, alkali; skeletal, fast</i>       | 33.91       | 0.40        | 70.16   | 2.33E-06 |
| ENSDARG00000008494  | <i>myl6</i>     | <i>myosin, light chain 6, smooth muscle and non-muscle</i> | 9.19        | 2.74        | 2.74    | 1.13E-06 |
| ENSDARG000000062592 | <i>myl10</i>    | <i>myosin, light chain 10, regulatory</i>                  | 4.83        | 0.12        | 35.26   | 4.18E-05 |
| ENSDARG00000017441  | <i>mylz3</i>    | <i>myosin, light polypeptide 3, skeletal muscle</i>        | 95.64       | 3.36        | 23.79   | 1.99E-05 |
| ENSDARG00000079564  | <i>vmhc</i>     | <i>ventricular myosin heavy chain</i>                      | 283.63      | 24.75       | 9.51    | 8.55E-20 |
| ENSDARG00000009782  | <i>myh11a</i>   | <i>myosin, heavy polypeptide 11, smooth muscle a</i>       | 5.96        | 2.02        | 2.39    | 1.52E-05 |
| ENSDARG000000093467 | <i>MYH13</i>    | <i>myosin, heavy polypeptide 13</i>                        | 0.67        | 0.02        | 25.21   | 1.20E-04 |
| ENSDARG000000071433 | <i>smyhc2</i>   | <i>slow myosin heavy chain 2</i>                           | 0.54        | 0.02        | 25.22   | 1.51E-09 |
| ENSDARG000000067990 | <i>myhz1.1</i>  | <i>myosin, heavy polypeptide 1.1, skeletal muscle</i>      | 6.00        | 0.02        | 318.08  | 1.61E-12 |
| ENSDARG000000067995 | <i>myhz1.2</i>  | <i>myosin, heavy polypeptide 1.2, skeletal muscle</i>      | 3.60        | 0.05        | 63.88   | 3.50E-11 |
| ENSDARG00000012944  | <i>myhz2</i>    | <i>myosin, heavy polypeptide 2, fast muscle specific</i>   | 1.65        | 0.08        | 17.82   | 4.03E-08 |
| ENSDARG000000087402 | <i>tpm1</i>     | <i>tropomyosin 1 (alpha)</i>                               | 16.84       | 1.64        | 8.56    | 3.80E-05 |
| ENSDARG000000005162 | <i>tpm3</i>     | <i>tropomyosin 3</i>                                       | 22.46       | 5.70        | 3.23    | 4.99E-09 |
| ENSDARG000000019128 | <i>tpm4b</i>    | <i>tropomyosin 4b</i>                                      | 20.71       | 0.20        | 86.68   | 9.23E-40 |
| ENSDARG000000033683 | <i>tpma</i>     | <i>alpha-tropomyosin</i>                                   | 39.37       | 2.55        | 12.94   | 1.65E-03 |
| ENSDARG000000045822 | <i>tnnt2e</i>   | <i>troponin T2e, cardiac</i>                               | 0.78        | 0.14        | 4.68    | 3.03E-05 |
| ENSDARG000000030270 | <i>tnnt3a</i>   | <i>troponin T3a, skeletal, fast</i>                        | 3.62        | 0.00        | 760.73  | 1.54E-12 |
| ENSDARG000000068457 | <i>tnnt3b</i>   | <i>troponin T3b, skeletal, fast</i>                        | 22.82       | 1.82        | 10.48   | 1.00E-04 |
| ENSDARG000000070835 | <i>tnnc2</i>    | <i>troponin C type 2 (fast)</i>                            | 53.91       | 1.15        | 39.11   | 7.99E-11 |
| ENSDARG000000045592 | <i>tnni2a.1</i> | <i>troponin I, skeletal, fast 2a, tandem duplicate 1</i>   | 2.74        | 0.15        | 15.00   | 2.44E-03 |
| ENSDARG000000029069 | <i>tnni2a.4</i> | <i>troponin I, skeletal, fast 2a, tandem duplicate 4</i>   | 11.02       | 0.04        | 221.21  | 1.08E-11 |
| ENSDARG000000035958 | <i>tnni2b.1</i> | <i>troponin I, skeletal, fast 2b, tandem duplicate 1</i>   | 2.44        | 0.00        | 866.94  | 2.47E-12 |
| ENSDARG000000029995 | <i>tnni2b.2</i> | <i>troponin I, skeletal, fast 2b, tandem duplicate 2</i>   | 8.08        | 0.75        | 8.73    | 9.09E-07 |

B

| Ensembl Gene ID     | Gene Name         | Embryonic heart                                        | Adult heart | Fold change | P value |          |
|---------------------|-------------------|--------------------------------------------------------|-------------|-------------|---------|----------|
| ENSDARG000000071090 | <i>actn2</i>      | <i>actinin, alpha 2</i>                                | 168.80      | 547.77      | 3.99    | 7.26E-12 |
| ENSDARG000000028213 | <i>ttna</i>       | <i>titin a</i>                                         | 4.24        | 20.39       | 5.88    | 1.24E-12 |
| ENSDARG000000000563 | <i>ttnb</i>       | <i>titin b</i>                                         | 3.33        | 14.85       | 5.45    | 1.75E-17 |
| ENSDARG000000032976 | <i>cmlc1</i>      | <i>cardiac myosin light chain-1</i>                    | 2755.59     | 8777.13     | 3.94    | 8.20E-09 |
| ENSDARG00000019096  | <i>myl7</i>       | <i>myosin, light polypeptide 7, regulatory (cmlc2)</i> | 1494.78     | 4660.26     | 3.83    | 1.97E-11 |
| ENSDARG000000038123 | <i>myl9a</i>      | <i>myosin, light chain 9a, regulatory</i>              | 48.49       | 124.94      | 3.16    | 1.27E-08 |
| ENSDARG000000008030 | <i>myl9b</i>      | <i>myosin, light chain 9b, regulatory</i>              | 80.53       | 144.39      | 2.20    | 1.60E-04 |
| ENSDARG000000007344 | <i>tcap</i>       | <i>titin-cap (telethonin)</i>                          | 0.35        | 141.31      | 501.41  | 4.41E-20 |
| ENSDARG000000079782 | <i>vmhcl</i>      | <i>ventricular myosin heavy chain-like</i>             | 482.68      | 1975.71     | 5.00    | 5.30E-16 |
| ENSDARG000000076075 | <i>myh7ba</i>     | <i>myosin, heavy chain 7B, cardiac muscle, beta a</i>  | 20.01       | 67.46       | 4.03    | 8.54E-04 |
| ENSDARG000000073732 | <i>myh14</i>      | <i>myosin, heavy chain 14, non-muscle</i>              | 1.45        | 5.77        | 4.86    | 3.15E-15 |
| ENSDARG000000023963 | <i>tpm4a</i>      | <i>tropomyosin 4a</i>                                  | 1024.14     | 1683.55     | 2.01    | 8.24E-04 |
| ENSDARG000000020610 | <i>tnnt2a</i>     | <i>troponin T2a, cardiac</i>                           | 947.36      | 1859.01     | 2.41    | 1.96E-05 |
| ENSDARG000000011400 | <i>tnnc1a</i>     | <i>troponin C type 1a (slow)</i>                       | 546.73      | 1125.60     | 2.52    | 6.07E-06 |
| ENSDARG000000037539 | <i>tnnc1b</i>     | <i>troponin C type 1b (slow)</i>                       | 54.00       | 136.23      | 3.11    | 1.12E-07 |
| ENSDARG000000070827 | <i>zgc:112242</i> |                                                        | 0.16        | 14.59       | 116.57  | 1.33E-03 |
| ENSDARG000000028343 | <i>zgc:101560</i> |                                                        | 31.83       | 128.18      | 4.92    | 1.81E-15 |

List of sarcomeric genes upregulated in a zebrafish embryonic (A) and an adult heart (B). The average normalized expression level of each gene (using the R Package DESeq) in embryonic and adult heart. The fold change and adjusted *P* value were calculated by the R package DESeq in embryonic heart over that in adult heart (A) and vice versa (B).

**Supplemental Table 6.** 19 Human DCM - Associated Genes With Multiple Zebrafish Homologues

| Human DCM-Associated Gene |                                            | Zebrafish             |                    |          | mRNA Expression, RPKM |              |             |              |
|---------------------------|--------------------------------------------|-----------------------|--------------------|----------|-----------------------|--------------|-------------|--------------|
|                           |                                            | Orthologue            | Ensembl Gene ID    | Identity | Type*                 | Embryo Heart | Adult Heart | Adult Muscle |
| <i>ACTC1</i>              | Cardiac actin                              | <i>acta1a</i>         | ENSDARG00000036371 | 99.00%   | M                     | 29.14        | 78.48       | 0.41         |
|                           |                                            | <i>acta1b</i>         | ENSDARG00000055618 | 98.00%   | M                     | 710.50       | 1200.72     | 3.10         |
|                           |                                            | <i>hm:zewp0073</i>    | ENSDARG00000076126 | 99.00%   | M                     | 134.07       | 224.02      | 0.90         |
|                           |                                            | <i>actc1a</i>         | ENSDARG00000042535 | 99.00%   | M                     | 2860.02      | 4429.03     | 15.66        |
|                           |                                            | <i>actc1b</i>         | ENSDARG00000037840 | 99.00%   | M                     | 134.43       | 6.89        | 9490.87      |
| <i>ACTN2</i>              | ?-Actinin-2                                | <i>actn2</i>          | ENSDARG00000071090 | 85.01%   | 1                     | 168.80       | 547.77      | 1.28         |
|                           |                                            | <i>CABZ01111872.1</i> | ENSDARG00000090343 | 75.57%   | 1                     | 0.28         | 1.85        | 16.05        |
| <i>ANKRD1</i>             | Ankyrin repeat domain-containing protein 1 | <i>ankrd1a</i>        | ENSDARG00000075263 | 54.86%   | 1                     | 1.13         | 0.12        | 0.93         |
|                           |                                            | <i>ankrd1b</i>        | ENSDARG00000076192 | 45.14%   | 1                     | 0.05         | 0.09        | 0.01         |
| <i>CRYAB</i>              | Alpha B crystallin                         | <i>cryaba</i>         | ENSDARG00000042621 | 59.43%   | 1                     | 0.00         | 0.00        | 0.00         |
|                           |                                            | <i>cryabb</i>         | ENSDARG00000052447 | 58.86%   | 1                     | 0.02         | 2.05        | 1.31         |
| <i>DES</i>                | Desmin                                     | <i>desma</i>          | ENSDARG00000058656 | 71.91%   | 1                     | 162.66       | 248.08      | 56.60        |
|                           |                                            | <i>desmb</i>          | ENSDARG00000005221 | 71.06%   | 1                     | 0.88         | 0.09        | 0.02         |

Supplemental Table 6 (continued)

| Human DCM-Associated Gene |                               | Zebrafish               |                    | Identity | Type* | mRNA Expression, RPKM |             |              |
|---------------------------|-------------------------------|-------------------------|--------------------|----------|-------|-----------------------|-------------|--------------|
|                           |                               | Orthologue              | Ensembl Gene ID    |          |       | Embryo Heart          | Adult Heart | Adult Muscle |
| <i>DSP</i>                | Desmoplakin                   | <i>dspe</i>             | ENSDARG00000022309 | 47.76%   | 1     | 4.95                  | 5.79        | 5.75         |
|                           |                               | <i>dspe</i>             | ENSDARG00000076673 | 22.32%   | 1     | 8.31                  | 10.49       | 2.26         |
| <i>FHL2</i>               | Four and a half LIM domains 2 | <i>fhl2a</i>            | ENSDARG00000042018 | 82.44%   | 1     | 115.64                | 27.84       | 2.12         |
|                           |                               | <i>fhl2b</i>            | ENSDARG00000003991 | 81.36%   | 1     | 2.30                  | 10.73       | 0.70         |
| <i>LDB3</i>               | LIM domain binding 3          | <i>ldb3a</i>            | ENSDARG00000056322 | 45.80%   | M     | 46.17                 | 65.76       | 107.66       |
|                           |                               | <i>ldb3b</i>            | ENSDARG00000019202 | 22.97%   | M     | 32.19                 | 232.01      | 381.76       |
| <i>MYH6</i>               | ?-Myosin heavy chain          | <i>myh6</i>             | ENSDARG00000090637 | 82.98%   | M     | 109.73                | 173.77      | 0.10         |
|                           |                               | <i>vmhc</i>             | ENSDARG00000079564 | 86.00%   | M     | 283.63                | 24.75       | 0.66         |
|                           |                               | <i>vmhcl</i>            | ENSDARG00000079782 | 86.00%   | M     | 482.68                | 1975.71     | 0.66         |
|                           |                               | <i>CR450736.2</i>       | ENSDARG00000092902 | 86.00%   | M     | 0.02                  | 0.01        | 1.59         |
|                           |                               | <i>CU633479.5</i>       | ENSDARG00000092357 | 86.00%   | M     | 0.01                  | 0.03        | 1.29         |
|                           |                               | <i>CU633479.6</i>       | ENSDARG00000093148 | 86.00%   | M     | 0.08                  | 0.01        | 4.78         |
|                           |                               | <i>si:ch211-24n20.3</i> | ENSDARG00000093715 | 86.00%   | M     | 0.07                  | 0.00        | 5.19         |



Supplemental Table 6 (continued)

| Human DCM-Associated Gene |                                                | Zebrafish               |                    | Identity | Type* | mRNA Expression, RPKM |             |              |
|---------------------------|------------------------------------------------|-------------------------|--------------------|----------|-------|-----------------------|-------------|--------------|
|                           |                                                | Orthologue              | Ensembl Gene ID    |          |       | Embryo Heart          | Adult Heart | Adult Muscle |
| <i>MYH7</i>               | ?-Myosin heavy chain                           | <i>myh7ba</i>           | ENSDARG00000076075 | 67.44%   | M     | 20.01                 | 67.46       | 3.75         |
|                           |                                                | <i>myh7bb</i>           | ENSDARG00000035322 | 66.25%   | M     | 8.31                  | 6.64        | 0.45         |
|                           |                                                | <i>vmhc</i>             | ENSDARG00000079564 | 85.99%   | M     | 283.63                | 24.75       | 0.66         |
|                           |                                                | <i>vmhcl</i>            | ENSDARG00000079782 | 85.89%   | M     | 482.68                | 1975.71     | 0.66         |
|                           |                                                | <i>CR450736.2</i>       | ENSDARG00000092902 | 87.00%   | M     | 0.02                  | 0.01        | 1.59         |
|                           |                                                | <i>CU633479.5</i>       | ENSDARG00000092357 | 86.00%   | M     | 0.01                  | 0.03        | 1.29         |
|                           |                                                | <i>CU633479.6</i>       | ENSDARG00000093148 | 86.00%   | M     | 0.08                  | 0.01        | 4.78         |
|                           |                                                | <i>si:ch211-24n20.3</i> | ENSDARG00000093715 | 86.00%   | M     | 0.07                  | 0.00        | 5.19         |
| <i>PDLIM3</i>             | PDZ LIM domain protein 3                       | <i>pdlim3a</i>          | ENSDARG00000011023 | 57.59%   | 1     | 1.50                  | 1.98        | 0.09         |
|                           |                                                | <i>pdlim3b</i>          | ENSDARG00000014248 | 58.23%   | 1     | 5.88                  | 9.47        | 0.95         |
| <i>SCN5A</i>              | Sodium channel                                 | <i>scn12aa</i>          | ENSDARG00000059692 | 64.00%   | M     | 0.00                  | 0.01        | 0.00         |
|                           |                                                | <i>scn12ab</i>          | ENSDARG00000078758 | 65.00%   | M     | 1.43                  | 7.11        | 0.04         |
| <i>SYNE1</i>              | Spectrin repeat containing, nuclear envelope 1 | <i>syne1a</i>           | ENSDARG00000009499 | 49.42%   | 1     | 1.39                  | 2.48        | 0.45         |
|                           |                                                | <i>syne1b</i>           | ENSDARG00000063068 | 55.39%   | 1     | 0.75                  | 1.06        | 0.55         |

Supplemental Table 6 (continued)

| Human DCM-Associated Gene |                                     | Zebrafish       |                    |          | mRNA Expression, RPKM |              |             |              |
|---------------------------|-------------------------------------|-----------------|--------------------|----------|-----------------------|--------------|-------------|--------------|
|                           |                                     | Orthologue      | Ensembl Gene ID    | Identity | Type*                 | Embryo Heart | Adult Heart | Adult Muscle |
| <i>SYNE2</i>              | Spectrin repeat containing, nuclear | <i>syne2a</i>   | ENSDARG00000030107 | 17.03%   | 1                     | 0.13         | 0.08        | 2.09         |
|                           | envelope 2                          | <i>syne2b</i>   | ENSDARG00000053484 | 24.97%   | 1                     | 2.69         | 10.39       | 2.80         |
| <i>TMPO</i>               | Thymopoietin                        | <i>Tmpoa</i>    | ENSDARG00000007315 | 47.98%   | 1                     | 7.24         | 1.32        | 0.70         |
|                           |                                     | <i>Tmpob</i>    | ENSDARG00000022978 | 46.37%   | 1                     | 2.71         | 1.04        | 1.12         |
| <i>TNNC1</i>              | Cardiac troponin C                  | <i>tnnc1a</i>   | ENSDARG00000011400 | 89.44%   | 1                     | 546.73       | 1125.60     | 0.41         |
|                           |                                     | <i>tnnc1b</i>   | ENSDARG00000037539 | 88.20%   | 1                     | 54.00        | 136.23      | 54.31        |
| <i>TNNI3</i>              | Cardiac troponin I                  | <i>tnni1a</i>   | ENSDARG00000000474 | 49.00%   | M                     | 0.17         | 0.23        | 0.26         |
|                           |                                     | <i>tnni1al</i>  | ENSDARG00000036671 | 49.00%   | M                     | 0.06         | 0.07        | 4.12         |
|                           |                                     | <i>tnni1b</i>   | ENSDARG00000052708 | 54.00%   | M                     | 280.29       | 334.69      | 1.33         |
|                           |                                     | <i>tnni1c</i>   | ENSDARG00000042559 | 53.00%   | M                     | 1.35         | 1.45        | 25.31        |
|                           |                                     | <i>tnni1d</i>   | ENSDARG00000073766 | 50.00%   | M                     | 0.06         | 1.14        | 3.23         |
|                           |                                     | <i>tnni2a.1</i> | ENSDARG00000045592 | 48.00%   | M                     | 2.74         | 0.15        | 0.88         |
|                           |                                     | <i>tnni2a.2</i> | ENSDARG00000005841 | 34.00%   | M                     | 2.40         | 5.84        | 15.76        |
| <i>tnni2a.3</i>           | ENSDARG00000013752                  | 37.00%          | M                  | 1.13     | 0.89                  | 1385.45      |             |              |

Supplemental Table 6 (continued)

| Human DCM-Associated Gene |                    | Zebrafish               |                    |          | mRNA Expression, RPKM |              |             |              |
|---------------------------|--------------------|-------------------------|--------------------|----------|-----------------------|--------------|-------------|--------------|
|                           |                    | Orthologue              | Ensembl Gene ID    | Identity | Type*                 | Embryo Heart | Adult Heart | Adult Muscle |
|                           |                    | <i>tnni2a.4</i>         | ENSDARG00000029069 | 40.00%   | M                     | 11.02        | 0.04        | 58.12        |
|                           |                    | <i>tnni2b.1</i>         | ENSDARG00000035958 | 47.00%   | M                     | 2.44         | 0.00        | 0.19         |
|                           |                    | <i>tnni2b.2</i>         | ENSDARG00000029995 | 43.00%   | M                     | 8.08         | 0.75        | 1135.97      |
|                           |                    | <i>zgc:112242</i>       | ENSDARG00000070827 | 49.00%   | M                     | 0.16         | 14.59       | 5.87         |
|                           |                    | <i>zgc:101560</i>       | ENSDARG00000028343 | 37.00%   | M                     | 31.83        | 128.18      | 1.27         |
|                           |                    | <i>si:dkey-206m15.8</i> | ENSDARG00000092999 | 34.00%   | M                     | 0.14         | 0.05        | 5.24         |
| <i>TNNT2</i>              | Cardiac troponin T | <i>tnnt2a</i>           | ENSDARG00000020610 | 54.24%   | M                     | 947.36       | 1859.01     | 0.78         |
|                           |                    | <i>tnnt2b</i>           | ENSDARG00000031920 | 47.46%   | M                     | 1.73         | 1.12        | 2.27         |
|                           |                    | <i>tnnt2c</i>           | ENSDARG00000032242 | 48.00%   | M                     | 0.36         | 0.44        | 0.25         |
| <i>TTN</i>                | Titin              | <i>ttna</i>             | ENSDARG00000028213 | 58.10%   | M                     | 4.24         | 20.39       | 48.00        |
|                           |                    | <i>ttnb</i>             | ENSDARG00000000563 | 59.88%   | M                     | 3.33         | 14.85       | 53.11        |

Abbreviations: DCM, dilated cardiomyopathy; RPKM, reads per kilobase per million reads.

\* Human and zebrafish genes were either many-to-many orthologues (“M”) or 1 human to many zebrafish orthologues (“1”).

**Supplemental Table 7: List of upregulated genes in Hedgehog signaling pathway in embryonic heart**

| <b>Ensembl Gene ID</b> | <b>Gene Name</b>                                                                    | <b>Fold change</b> | <b>P value</b> |
|------------------------|-------------------------------------------------------------------------------------|--------------------|----------------|
| ENSDARG00000025641     | <i>gli2a</i> <i>GLI family zinc finger 2a</i>                                       | 5.71E+00           | 8.90E-13       |
| ENSDARG00000041430     | <i>bmp2b</i> <i>bone morphogenetic protein 2b</i>                                   | 7.69E+00           | 1.35E-10       |
| ENSDARG00000019995     | <i>bmp4</i> <i>bone morphogenetic protein 4</i>                                     | 1.35E+01           | 1.43E-25       |
| ENSDARG00000004965     | <i>bmp5</i> <i>bone morphogenetic protein 5</i>                                     | 1.72E+01           | 2.03E-33       |
| ENSDARG00000063230     | <i>bmp7b</i> <i>bone morphogenetic protein 7b</i>                                   | 5.79E+00           | 7.64E-10       |
| ENSDARG00000077298     | <i>gas1a</i> <i>growth arrest-specific 1a</i>                                       | 5.71E+00           | 4.26E-15       |
| ENSDARG00000060397     | <i>hhip</i> <i>hedgehog interacting protein</i>                                     | 5.76E+00           | 2.11E-11       |
| ENSDARG00000060649     | <i>lrp2a</i> <i>low density lipoprotein receptor-related protein 2a</i>             | 3.36E+00           | 3.59E-04       |
| ENSDARG00000055026     | <i>ptch2</i> <i>patched 2</i>                                                       | 2.76E+00           | 5.20E-06       |
| ENSDARG00000002952     | <i>smo</i> <i>smoothened, frizzled class receptor</i>                               | 3.10E+00           | 2.16E-07       |
| ENSDARG00000068567     | <i>shha</i> <i>sonic hedgehog a</i>                                                 | 1.19E+01           | 7.08E-04       |
| ENSDARG00000014796     | <i>wnt11r</i> <i>wingless-type MMTV integration site family, member 11, related</i> | 3.38E+00           | 3.45E-10       |
| ENSDARG00000032234     | <i>wnt2bb</i> <i>wingless-type MMTV integration site family, member 2Bb</i>         | 2.16E+00           | 1.31E-03       |
| ENSDARG00000034894     | <i>wnt5b</i> <i>wingless-type MMTV integration site family, member 5b</i>           | 2.24E+00           | 1.88E-04       |
| ENSDARG00000073935     | <i>wnt6b</i> <i>wingless-type MMTV integration site family, member 6b</i>           | 3.20E+00           | 9.68E-03       |
| ENSDARG00000044827     | <i>wnt7aa</i> <i>wingless-type MMTV integration site family, member 7Aa</i>         | 7.29E+00           | 8.23E-10       |
| ENSDARG00000071107     | <i>wnt7bb</i> <i>wingless-type MMTV integration site family, member 7Bb</i>         | 3.52E+01           | 2.55E-03       |
| ENSDARG00000063437     | <i>wnt9a</i> <i>wingless-type MMTV integration site family, member 9A</i>           | 1.30E+01           | 1.22E-06       |
| ENSDARG00000037889     | <i>wnt9b</i> <i>wingless-type MMTV integration site family, member 9B</i>           | 3.21E+01           | 3.01E-08       |

The fold change and adjusted *P* value were calculated by the R package DESeq in embryonic heart over that in adult heart.

## Supplemental Table 8: List of upregulated genes in TGF-beta signaling pathway in embryonic heart

| Ensembl Gene ID    | Gene Name                                                                             | Fold change | P value  |
|--------------------|---------------------------------------------------------------------------------------|-------------|----------|
| ENSDARG00000029358 | <i>e2f4</i> E2F transcription factor 4                                                | 2.23E+00    | 5.50E-04 |
| ENSDARG00000070428 | <i>smad4a</i> SMAD family member 4a                                                   | 3.46E+00    | 1.64E-08 |
| ENSDARG00000053209 | <i>smad6a</i> SMAD family member 6a                                                   | 2.78E+00    | 6.39E-07 |
| ENSDARG00000021938 | <i>smad9</i> SMAD family member 9                                                     | 2.35E+00    | 2.45E-04 |
| ENSDARG00000041516 | <i>acvr2b</i> activin A receptor, type IIB                                            | 2.73E+00    | 1.53E-03 |
| ENSDARG00000041430 | <i>bmp2b</i> bone morphogenetic protein 2                                             | 7.69E+00    | 1.35E-10 |
| ENSDARG00000019995 | <i>bmp4</i> bone morphogenetic protein 4                                              | 1.35E+01    | 1.43E-25 |
| ENSDARG00000004965 | <i>bmp5</i> bone morphogenetic protein 5                                              | 1.72E+01    | 2.03E-33 |
| ENSDARG00000063230 | <i>bmp7b</i> bone morphogenetic protein 7                                             | 5.79E+00    | 7.64E-10 |
| ENSDARG00000052846 | <i>fsta</i> follistatin a                                                             | 4.86E+00    | 5.26E-06 |
| ENSDARG00000053479 | <i>gdf6a</i> growth differentiation factor 6a                                         | 2.36E+01    | 1.06E-22 |
| ENSDARG00000040764 | <i>id1</i> inhibitor of DNA binding 1                                                 | 7.29E+00    | 2.33E-22 |
| ENSDARG00000055283 | <i>id2a</i> inhibitor of DNA binding 2, dominant negative helix-loop-helix protein, a | 2.82E+00    | 9.99E-07 |
| ENSDARG00000054823 | <i>id3</i> inhibitor of DNA binding 3                                                 | 2.99E+00    | 2.13E-07 |
| ENSDARG00000045131 | <i>id4</i> inhibitor of DNA binding 4                                                 | 3.96E+00    | 1.06E-07 |
| ENSDARG00000056922 | <i>ltbp1</i> latent transforming growth factor beta binding protein 1                 | 3.93E+00    | 1.13E-10 |
| ENSDARG00000044059 | <i>lft2</i> lefty2                                                                    | 7.83E+01    | 2.16E-12 |
| ENSDARG00000058819 | <i>nog1</i> noggin 1                                                                  | 7.37E+00    | 6.85E-04 |
| ENSDARG00000036194 | <i>pitx2</i> paired-like homeodomain 2                                                | 1.56E+01    | 4.99E-28 |
| ENSDARG00000032430 | <i>ppp2r1b</i> protein phosphatase 2, regulatory subunit A, beta                      | 2.14E+00    | 2.05E-04 |
| ENSDARG00000008141 | <i>rbl1</i> retinoblastoma-like 1 (p107)                                              | 2.69E+00    | 9.33E-06 |
| ENSDARG00000010785 | <i>thbs1b</i> thrombospondin 1b                                                       | 2.65E+00    | 3.86E-04 |
| ENSDARG00000073810 | <i>thbs2b</i> thrombospondin 2b                                                       | 5.24E+00    | 5.44E-14 |
| ENSDARG00000012060 | <i>thbs3b</i> thrombospondin 3b                                                       | 4.47E+00    | 3.72E-03 |
| ENSDARG00000020072 | <i>thbs4b</i> thrombospondin 4b                                                       | 3.45E+00    | 5.63E-03 |
| ENSDARG00000077473 | <i>mych</i> myelocytomatosis oncogene homolog                                         | 4.86E+00    | 7.49E-13 |

The fold change and adjusted *P* value were calculated by the R package DESeq in embryonic heart over that in adult heart.

**Supplemental Table 9. Differential expression of zebrafish homologues of DCM-causative genes with multiple homologues in hearts and in muscles.**

| <b>Zebrafish orthologues</b>    | <b>Fold Change</b> | <b>P value</b> |
|---------------------------------|--------------------|----------------|
| <b>Cardiac-Enriched</b>         |                    |                |
| <i>vmhcl</i>                    | 1784.02            | 2.98E-138      |
| <i>tnnc1a</i>                   | 1639.25            | 1.36E-133      |
| <i>tnnt2a</i>                   | 1427.04            | 4.45E-132      |
| <i>myh6</i>                     | 1082.61            | 9.92E-69       |
| <i>actn2</i>                    | 258.31             | 7.62E-94       |
| <i>acta1b</i>                   | 248.67             | 2.74E-04       |
| <i>actc1a</i>                   | 178.41             | 1.13E-15       |
| <i>hm:zewp0073</i>              | 157.02             | 6.83E-15       |
| <i>tnni1b</i>                   | 152.79             | 6.50E-82       |
| <i>scn12ab</i>                  | 111.39             | 5.89E-36       |
| <i>zgc:101560</i>               | 60.47              | 1.18E-61       |
| <i>vmhc</i>                     | 22.40              | 9.47E-12       |
| <i>pdlim3a</i>                  | 13.16              | 2.15E-13       |
| <i>myh7ba</i>                   | 10.62              | 3.21E-07       |
| <i>fhl2b</i>                    | 9.28               | 2.30E-22       |
| <i>myh7bb</i>                   | 8.73               | 3.13E-07       |
| <i>fhl2a</i>                    | 7.99               | 2.39E-20       |
| <i>pdlim3b</i>                  | 6.19               | 4.14E-11       |
| <i>syne1a</i>                   | 3.38               | 2.88E-08       |
| <i>dspb</i>                     | 2.88               | 1.99E-04       |
| <i>desma</i>                    | 2.68               | 9.31E-06       |
| <i>syne2b</i>                   | 2.28               | 3.06E-04       |
| <b>Skeletal-Muscle Enriched</b> |                    |                |
| <i>si:ch211-24n20.3</i>         | 3391.34            | 5.92E-15       |
| <i>tnni2a.3</i>                 | 2602.91            | 2.90E-141      |
| <i>tnni2b.2</i>                 | 2418.42            | 2.36E-30       |
| <i>tnni2a.4</i>                 | 2328.37            | 4.86E-30       |
| <i>actc1b</i>                   | 2251.67            | 2.20E-140      |
| <i>CU633479.6</i>               | 1069.78            | 4.56E-12       |
| <i>CR450736.2</i>               | 208.05             | 2.56E-17       |
| <i>si:dkey-206m15.8</i>         | 172.99             | 1.08E-06       |
| <i>tnni2b.1</i>                 | 139.03             | 3.40E-06       |
| <i>tnni1al</i>                  | 96.12              | 1.70E-06       |
| <i>CU633479.5</i>               | 66.04              | 6.62E-08       |
| <i>syne2a</i>                   | 40.48              | 4.49E-34       |
| <i>zgc:153662(tnni1c)</i>       | 30.52              | 2.95E-04       |
| <i>ankrd1a</i>                  | 12.18              | 1.72E-03       |
| <i>ttnb</i>                     | 5.89               | 1.01E-15       |
| <i>ttna</i>                     | 3.86               | 7.75E-10       |
| <i>ldb3b</i>                    | 2.69               | 8.66E-06       |
| <i>ldb3a</i>                    | 2.66               | 9.63E-06       |

The average normalized expression level of each gene (using the R Package DESeq) in adult heart and muscle. The fold change and adjusted *P* value were calculated by the R package DESeq in adult heart over that in adult muscle (A) and vice versa (B).

**A**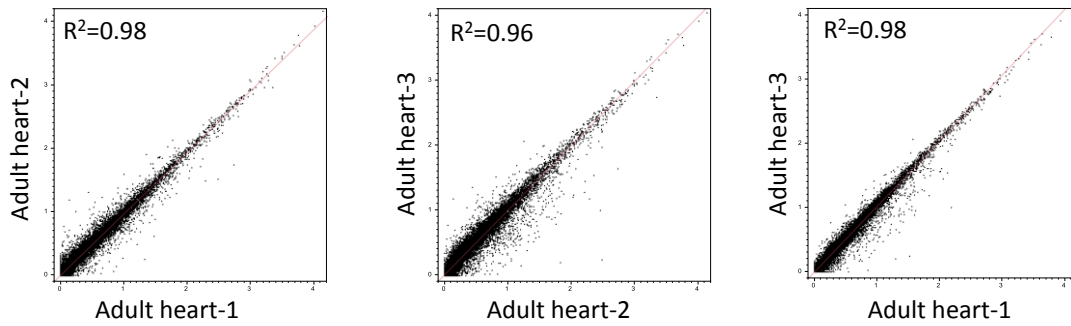**B**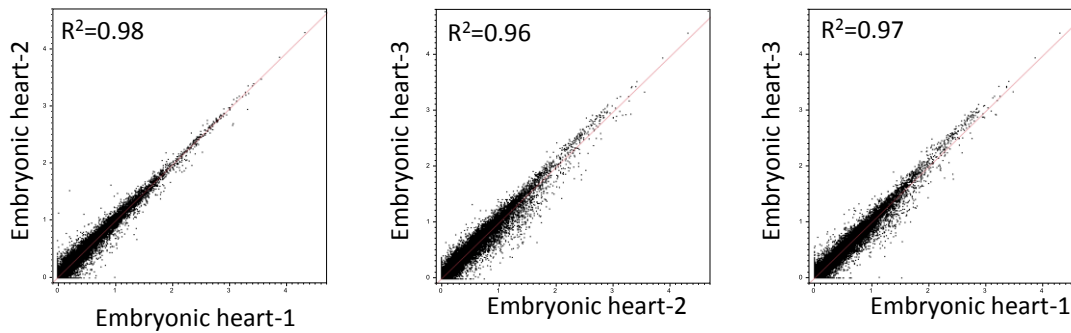**C**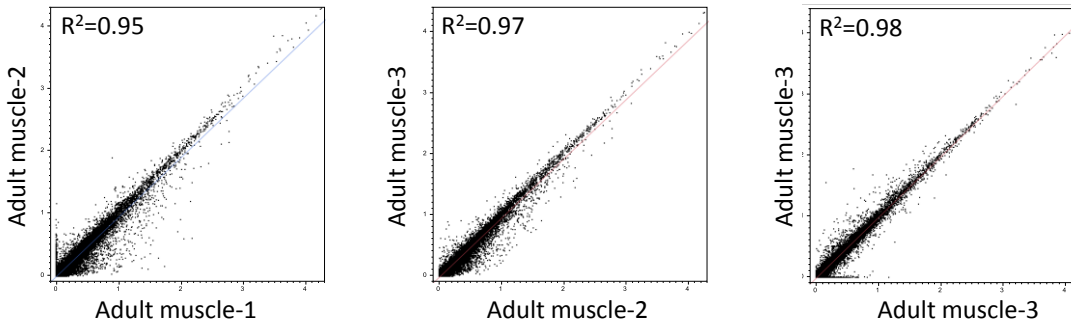**Supplemental Fig. 1 Biological repeats of RNA-seq analysis.**

Scatter plots of Log<sub>10</sub>(RPKM+1) values between individual samples of three biological repeats for RNA-seq analysis of adult heart (A), embryonic heart (B) and adult muscle (C). The Pearson correlation coefficient (R<sup>2</sup>) is shown in each comparison. RPKM indicates reads per kilobase per million reads.

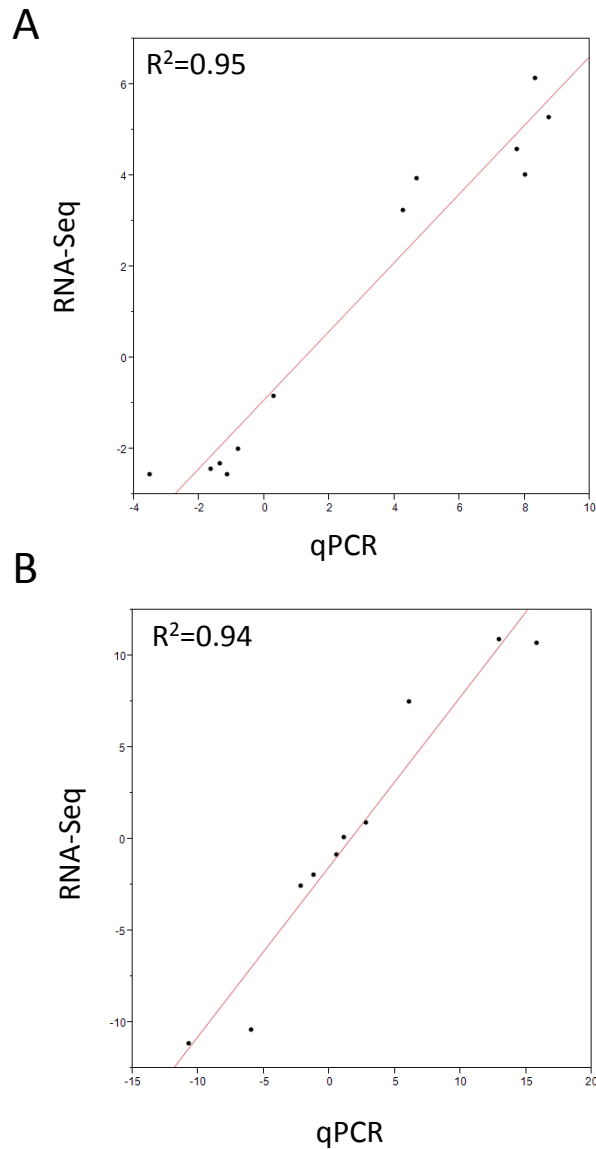

**Supplemental Fig. 2 qPCR validation of gene expression level estimated by RNA-seq**

X axis is the  $\Delta\Delta C_t$  values of qPCR comparing different samples normalized by the expression level of *gapdh*. Y axis is the Log<sub>2</sub> of fold change of the RPKM between the samples. Scatter plots based on examined genes shown in comparison of (A) adult heart and embryo heart and (B) adult heart and muscle. The Pearson correlation coefficient ( $R^2$ ) is shown in each comparison.



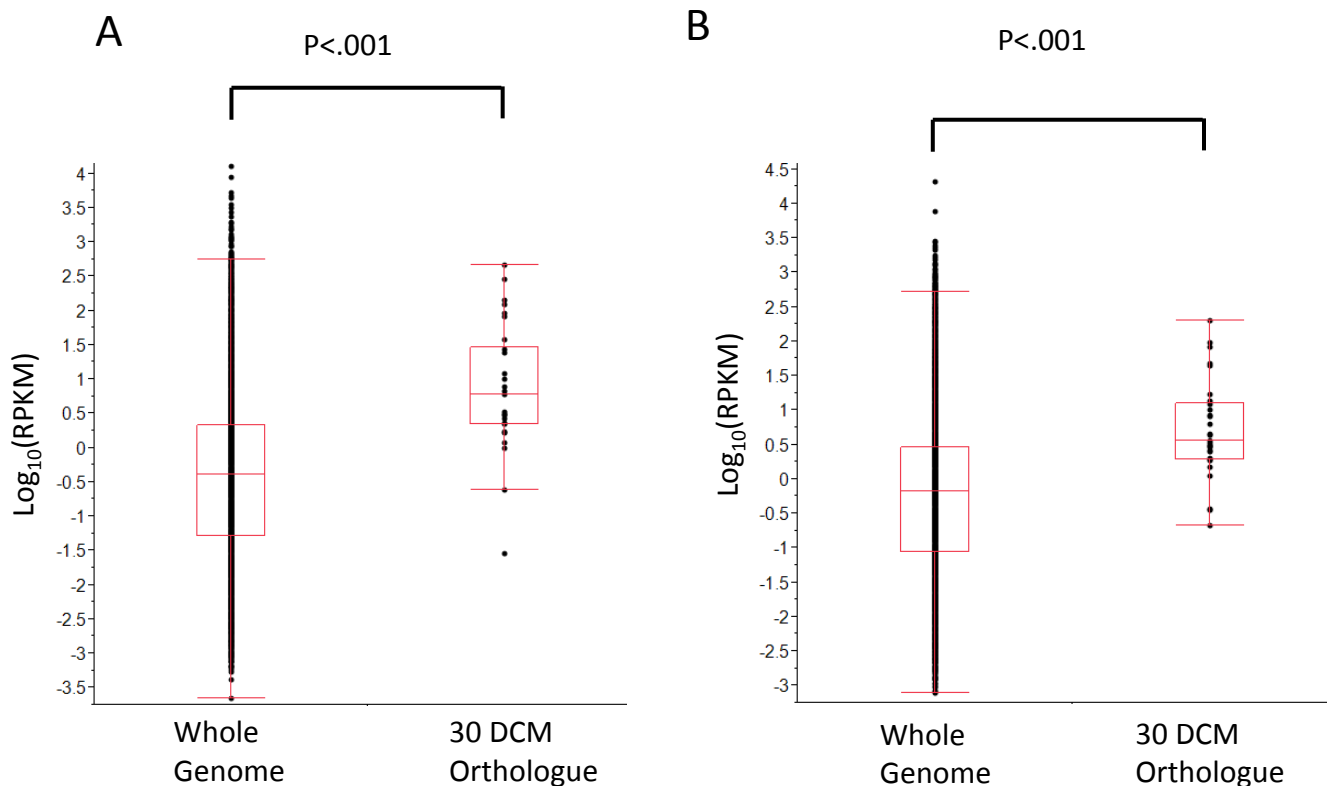

**Supplemental Figure 3. Expressional Analysis of Zebrafish Orthologues of 30 Dilated Cardiomyopathy–Causative Genes.** Box and whisker plots comparing expression levels of all genes in  $\log_{10}$ (reads per kilobase per million reads [RPKM]) between the whole zebrafish genome and 30 orthologues in adult heart (A) and embryonic heart (B).

A

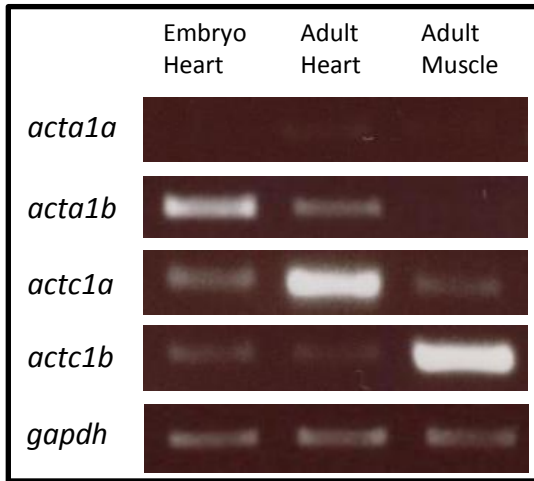

B

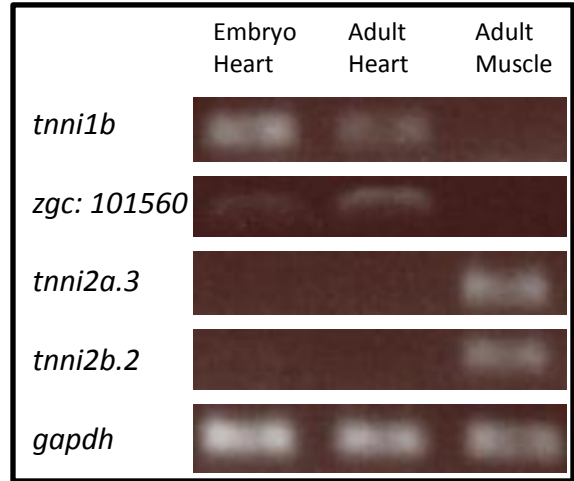

**Supplemental Fig 4. Validation of RNA-seq data with semi-Quantitative reverse transcriptase polymerase chain reaction (semi-qPCR).** Shown are semi-qPCR using cDNA extracted from embryonic hearts, adult hearts and adult muscles. Expression of genes within *actin* family (A) and *tnni* family (B) were assessed. *gapdh* was used as a loading control.
